# Supplementary material for: Nickel-catalyzed carbonylative domino cyclization of arylboronic acid pinacol esters with 2-alkynyl nitroarenes towardN-aroyl indoles
Source: Royal Society of Chemistry journal article supplement (doi:10.1039/d2qo00112h), 2022-01-01

## Supporting Information

### Nickel-Catalyzed Carbonylative Domino Cyclization of Arylboronic Acid Pinacol Esters with 2-Alkynyl Nitroarenes Toward *N*-Aroyl Indoles

Lingyun Yao,<sup>a</sup> Ping Wei,<sup>a</sup> Jun Ying,<sup>\*,a</sup> and Xiao-Feng Wu<sup>\*,b</sup>

<sup>a</sup> Department of Chemistry, Key Laboratory of Surface & Interface Science of Polymer Materials of Zhejiang Province, Zhejiang Sci-Tech University, Hangzhou 310018, China.

<sup>b</sup> Dalian National Laboratory for Clean Energy, Dalian Institute of Chemical Physics, Chinese Academy of Sciences, 116023 Dalian, Liaoning, China; Leibniz-Institut für Katalyse e. V., Albert-Einstein-Straße 29a, 18059 Rostock, Germany.

\*E-mail: yingjun@zstu.edu.cn

\*E-mail: xiao-feng.wu@catalysis.de

## Table of Contents

|                                                                                         |     |
|-----------------------------------------------------------------------------------------|-----|
| 1. General experimental information .....                                               | S1  |
| 2. General procedure for the synthesis of 2-nitroalkynes (1a–k) .....                   | S1  |
| 3. General procedure for the synthesis of indoles (3aa–aq and 3ba–ka).....              | S2  |
| 4. Characterization data of substrates 1f and 1i–k.....                                 | S3  |
| 5. Characterization data of products 3aa–aq, 3ba–ka, and 4 .....                        | S4  |
| 6. References .....                                                                     | S13 |
| 7. <sup>1</sup> H, <sup>13</sup> C NMR spectra of 1f, 1i–k, 3aa–aq, 3ba–ka, and 4 ..... | S14 |

## 1. General experimental information

Unless otherwise noted, all reactions were carried out under nitrogen atmosphere. All commercially available reagents were used without further purification. All of the solvents were treated according to known methods. Column chromatography was performed on silica gel (200-400 mesh).  $^1\text{H}$  NMR (400 MHz) chemical shifts were reported in ppm ( $\delta$ ) relative to tetramethylsilane (TMS) with the solvent resonance employed as the internal standard.  $^{13}\text{C}$  NMR (101 MHz) chemical shifts were reported in ppm ( $\delta$ ) from tetramethylsilane (TMS) with the solvent resonance as the internal standard. Data were reported as follows: chemical shift, multiplicity (s = singlet, d = doublet, t = triplet, q = quartet, dd = doublet of doublets, td = triplet of doublets, qd = quartet of doublets, m = multiplet), coupling constants (Hz) and integration. HRMS measurements were obtained on a TOF analyzer.

**Special precaution on  $\text{Ni}(\text{CO})_4$  formation during the reaction should be taken!!!**

## 2. General procedure for the synthesis of 2-nitroalkynes (**1a-k**)

The substrates **1a-e** and **1g-h** were prepared according to procedures described in the literature<sup>4</sup> reported before.

The 2-nitroalkynes **1f** and **1i-k** were prepared according to a general procedure reported by Shi.<sup>1</sup>

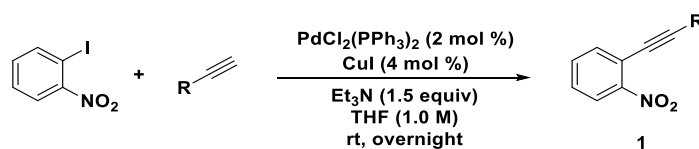

To a 50 mL flask charged with 1-iodo-2-nitrobenzene (5.0 mmol, 1.0 equiv),  $\text{PdCl}_2(\text{PPh}_3)_2$  (70.2 mg, 0.1 mmol, 2 mol%) and  $\text{CuI}$  (38.1 mg, 0.2 mmol, 4 mol%) in dry THF (5 mL) was added  $\text{Et}_3\text{N}$  (7.5 mmol, 1.5 equiv) and an alkyne (6.0 mmol, 1.2 equiv) under  $\text{N}_2$  atmosphere and the resulting solution was stirred at room temperature overnight. Upon completion, the solvent was removed under reduced pressure and the residue was extracted with ethyl acetate ( $3 \times 5$  mL), water ( $2 \times 10$  mL) and brine (10 mL). The combined organic layer was dried over  $\text{Na}_2\text{SO}_4$  and concentrated. The residue was purified by a silica-gel column chromatography (petroleum ether / ethyl acetate = 30 / 1) to give the 2-nitroalkyne **1**.

### 3. General procedure for the synthesis of indoles (3aa–aq and 3ba–ka)

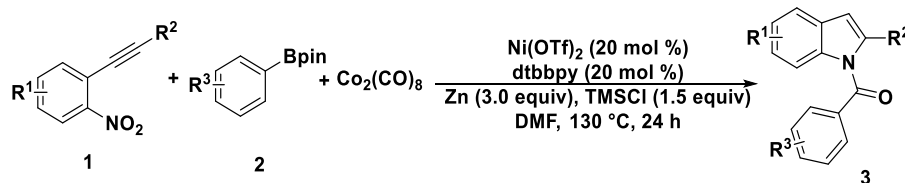

A 2-nitroalkyne **1** (0.4 mmol, 2.0 equiv), an aryl Bpin **2** (0.2 mmol, 1.0 equiv), Ni(OTf)<sub>2</sub> (14.3 mg, 0.04 mmol, 20 mol%), dtbbpy (10.7 mg, 0.04 mmol, 20 mol%), Zn (39.2 mg, 0.6 mmol, 3.0 equiv), TMSCl (32.6 mg, 0.3 mmol, 1.5 equiv), and Co<sub>2</sub>(CO)<sub>8</sub> (68.4 mg, 0.2 mmol, 1.0 equiv) were added to an oven-dried tube (15 mL). Then the tube was placed under vacuum and refilled with nitrogen three times. DMF (1.0 mL) were added into the tube via syringe. The tube was sealed and stirred at 130 °C for 24 h. The resulting mixture was purified by silica-gel column chromatography (petroleum ether/ ethyl acetate = 30 / 1) to obtain the indole **3**.

1 mmol scale: A 2-nitroalkyne **1a** (2 mmol, 2.0 equiv), an aryl Bpin **2a** (1 mmol, 1.0 equiv), Ni(OTf)<sub>2</sub> (20 mol%), dtbbpy (20 mol%), Zn (3.0 equiv), TMSCl (1.5 equiv), and Co<sub>2</sub>(CO)<sub>8</sub> (1.0 equiv) were added to an oven-dried tube (15 mL). Then the tube was placed under vacuum and refilled with nitrogen three times. DMF (5.0 mL) were added into the tube via syringe. The tube was sealed and stirred at 130 °C for 24 h. The resulting mixture was purified by silica-gel column chromatography (petroleum ether/ ethyl acetate = 30 / 1) to obtain the indole **3a** in 72% yield (213.9 mg).

#### 4. Characterization data of substrates 1f and 1i–k

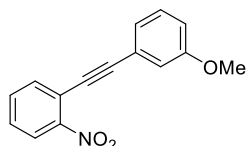

**1-((3-methoxyphenyl)ethynyl)-2-nitrobenzene (1f).**<sup>2</sup> Yellow solid in 76% yield; mp 39.7 – 41.5 °C; <sup>1</sup>H NMR (400 MHz, CDCl<sub>3</sub>) δ 8.08 (d, *J* = 8.2 Hz, 1H), 7.72 (d, *J* = 7.8 Hz, 1H), 7.62 – 7.58 (m, 1H), 7.49 – 7.44 (m, 1H), 7.28 (t, *J* = 8.0 Hz, 1H), 7.20 (d, *J* = 7.6 Hz, 1H), 7.13 – 7.09 (m, 1H), 6.96 – 6.93 (m, 1H), 3.83 (s, 3H); <sup>13</sup>C NMR (101 MHz, CDCl<sub>3</sub>) δ 159.5, 149.6, 134.7, 133.0, 129.7, 128.7, 124.9, 124.7, 123.4, 118.8, 116.6, 116.1, 97.1, 84.7, 55.5.

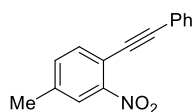

**4-methyl-2-nitro-1-(phenylethynyl)benzene (1i).**<sup>3</sup> Yellow solid in 59% yield; mp 41.9 – 43.4 °C; <sup>1</sup>H NMR (400 MHz, CDCl<sub>3</sub>) δ 7.88 (s, 1H), 7.60 – 7.57 (m, 3H), 7.40 – 7.35 (m, 4H), 2.45 (s, 3H); <sup>13</sup>C NMR (101 MHz, CDCl<sub>3</sub>) δ 149.5, 139.7, 134.4, 133.8, 132.0, 129.1, 128.5, 125.1, 122.7, 115.9, 96.2, 85.0, 21.3.

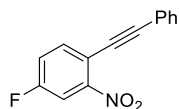

**4-fluoro-2-nitro-1-(phenylethynyl)benzene (1j).**<sup>3</sup> Yellow solid in 73% yield; mp 56.5 – 59.3 °C; <sup>1</sup>H NMR (400 MHz, CDCl<sub>3</sub>) δ 7.81 (dd, *J* = 8.3, 2.6 Hz, 1H), 7.70 (dd, *J* = 8.6, 5.5 Hz, 1H), 7.59 – 7.57 (m, 2H), 7.39 – 7.31 (m, 4H); <sup>13</sup>C NMR (101 MHz, CDCl<sub>3</sub>) δ 161.2 (d, *J* = 254.3 Hz, 1C), 150.2 (d, *J* = 8.2 Hz, 1C), 136.2 (d, *J* = 8.0 Hz, 1C), 132.0, 129.4, 128.6, 122.3, 120.8 (d, *J* = 21.9 Hz, 1C), 115.2 (d, *J* = 3.8 Hz, 1C), 112.6 (d, *J* = 27.0 Hz, 1C), 97.1 (d, *J* = 1.5 Hz, 1C), 83.9.

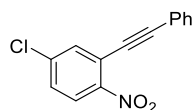

**4-chloro-1-nitro-2-(phenylethynyl)benzene (1k).**<sup>3</sup> Yellow solid in 68% yield; mp 60.4 – 62.3 °C; <sup>1</sup>H NMR (400 MHz, CDCl<sub>3</sub>) δ 8.05 (d, *J* = 8.8 Hz, 1H), 7.69 (d, *J* = 1.5 Hz, 1H), 7.61 – 7.58 (m,

2H), 7.43 – 7.36 (m, 4H).  $^{13}\text{C}$  NMR (101 MHz,  $\text{CDCl}_3$ )  $\delta$  147.7, 139.4, 134.1, 132.2, 129.7, 128.7, 128.6, 126.2, 121.9, 120.5, 98.7, 84.0.

## 5. Characterization data of products 3aa–aq, 3ba–ka, and 4

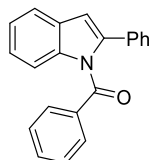

**phenyl(2-phenyl-1H-indol-1-yl)methanone (3aa).**<sup>4</sup> Yellow solid, 41.6 mg, 70% yield, mp 107.9 – 109.5 °C;  $^1\text{H}$  NMR (400 MHz,  $\text{CDCl}_3$ )  $\delta$  7.70 – 7.62 (m, 4H), 7.40 (t,  $J = 7.4$  Hz, 1H), 7.32 – 7.24 (m, 6H), 7.19 (t,  $J = 7.3$  Hz, 2H), 7.15 – 7.11 (m, 1H), 6.79 (s, 1H).  $^{13}\text{C}$  NMR (101 MHz,  $\text{CDCl}_3$ )  $\delta$  170.2, 141.4, 138.3, 135.2, 133.1, 132.9, 130.4, 129.4, 128.5, 128.4, 128.3, 127.7, 124.3, 123.2, 120.8, 114.2, 109.6.

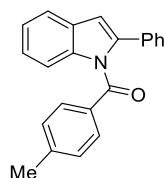

**(2-phenyl-1H-indol-1-yl)(p-tolyl)methanone (3ab).**<sup>4</sup> Yellow solid, 35.5 mg, 57% yield, mp 143.7 – 146.5 °C;  $^1\text{H}$  NMR (400 MHz,  $\text{CDCl}_3$ )  $\delta$  7.65 – 7.63 (m, 1H), 7.58 (d,  $J = 8.1$  Hz, 3H), 7.34 (d,  $J = 7.5$  Hz, 2H), 7.28 – 7.20 (m, 4H), 7.18 – 7.14 (m, 1H), 7.09 (d,  $J = 8.0$  Hz, 2H), 6.79 (s, 1H), 2.34 (s, 3H);  $^{13}\text{C}$  NMR (101 MHz,  $\text{CDCl}_3$ )  $\delta$  170.1, 144.0, 141.5, 138.3, 133.1, 132.3, 130.6, 129.4, 129.2, 128.3, 127.6, 124.1, 123.0, 120.8, 114.0, 109.2, 21.8.

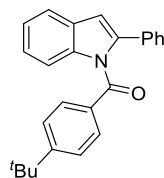

**(4-(tert-butyl)phenyl)(2-phenyl-1H-indol-1-yl)methanone (3ac).**<sup>4</sup> Yellow oil, 36.8 mg, 52% yield;  $^1\text{H}$  NMR (400 MHz,  $\text{CDCl}_3$ )  $\delta$  7.73 – 7.69 (m, 1H), 7.69 – 7.65 (m, 1H), 7.61 – 7.59 (m, 2H), 7.33 – 7.27 (m, 6H), 7.21 – 7.17 (m, 2H), 7.15 – 7.11 (m, 1H), 6.80 (s, 1H), 1.28 (s, 9H);  $^{13}\text{C}$  NMR (101

MHz, CDCl<sub>3</sub>)  $\delta$  170.1, 156.7, 141.5, 138.4, 133.2, 132.2, 130.4, 129.4, 128.5, 128.2, 127.5, 125.3, 124.2, 123.1, 120.8, 114.2, 109.3, 35.2, 31.1.

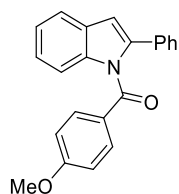

**(4-methoxyphenyl)(2-phenyl-1H-indol-1-yl)methanone (3ad).**<sup>4</sup> Yellow oil, 44.5 mg, 68% yield; <sup>1</sup>H NMR (400 MHz, CDCl<sub>3</sub>)  $\delta$  7.69 – 7.62 (m, 3H), 7.56 (dd,  $J$  = 6.7, 2.4 Hz, 1H), 7.36 – 7.34 (m, 2H), 7.27 – 7.21 (m, 4H), 7.19 – 7.15 (m, 1H), 6.80 – 6.77 (m, 3H), 3.81 (s, 3H); <sup>13</sup>C NMR (101 MHz, CDCl<sub>3</sub>)  $\delta$  169.4, 163.6, 141.5, 138.4, 133.1, 132.9, 129.3, 128.4, 128.3, 127.7, 127.3, 124.0, 122.8, 120.8, 113.9, 113.8, 108.8, 55.6.

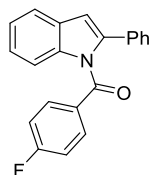

**(4-fluorophenyl)(2-phenyl-1H-indol-1-yl)methanone (3ae).**<sup>4</sup> Yellow oil, 39.1 mg, 62% yield; <sup>1</sup>H NMR (400 MHz, CDCl<sub>3</sub>)  $\delta$  7.78 – 7.75 (m, 1H), 7.67 – 7.61 (m, 3H), 7.32 – 7.28 (m, 4H), 7.22 – 7.13 (m, 3H), 6.95 – 6.89 (m, 2H), 6.79 (s, 1H); <sup>13</sup>C NMR (101 MHz, CDCl<sub>3</sub>)  $\delta$  168.9, 165.4 (d,  $J$  = 255.2 Hz, 1C), 141.1, 138.3, 132.9 (d,  $J$  = 9.4 Hz, 1C), 131.4 (d,  $J$  = 3.0 Hz, 1C), 129.3, 128.45, 128.40, 127.8, 124.5, 123.4, 120.9, 115.6 (d,  $J$  = 22.2 Hz, 1C), 114.1, 109.6.

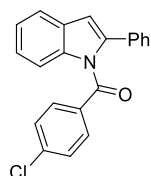

**(4-chlorophenyl)(2-phenyl-1H-indol-1-yl)methanone (3af).**<sup>4</sup> Yellow oil, 35.2 mg, 53% yield; <sup>1</sup>H NMR (400 MHz, CDCl<sub>3</sub>)  $\delta$  7.79 – 7.77 (m, 1H), 7.67 – 7.64 (m, 1H), 7.55 (d,  $J$  = 8.5 Hz, 2H), 7.32 – 7.28 (m, 4H), 7.23 – 7.17 (m, 5H), 6.80 (s, 1H); <sup>13</sup>C NMR (101 MHz, CDCl<sub>3</sub>)  $\delta$  169.1, 141.1, 139.2, 138.2, 133.6, 132.9, 131.7, 129.4, 128.7, 128.5, 128.4, 127.9, 124.6, 123.5, 120.9, 114.2,

109.8.

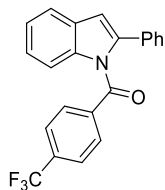

**(2-phenyl-1*H*-indol-1-yl)(4-(trifluoromethyl)phenyl)methanone (3ag).**<sup>4</sup> Yellow solid, 40.9 mg, 56% yield, mp 110.6 – 113.9 °C; <sup>1</sup>H NMR (400 MHz, CDCl<sub>3</sub>) δ 7.92 – 7.88 (m, 1H), 7.67 – 7.64 (m, 3H), 7.45 (d, *J* = 8.2 Hz, 2H), 7.36 – 7.32 (m, 2H), 7.24 – 7.22 (m, 2H), 7.17 – 7.09 (m, 3H), 6.79 (s, 1H); <sup>13</sup>C NMR (101 MHz, CDCl<sub>3</sub>) δ 168.9, 140.9, 138.6, 138.2, 133.8 (q, *J* = 32.8 Hz, 1C), 132.9, 130.4, 129.4, 128.7, 128.4, 127.9, 125.2 (q, *J* = 3.6 Hz, 1C), 124.9, 123.8, 123.5 (q, *J* = 272.8 Hz, 1C), 121.0, 114.5, 110.4.

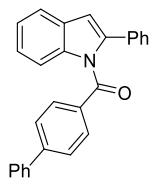

**[1,1'-biphenyl]-4-yl(2-phenyl-1*H*-indol-1-yl)methanone (3ah).**<sup>4</sup> Yellow oil, 46.3 mg, 62% yield; <sup>1</sup>H NMR (400 MHz, CDCl<sub>3</sub>) δ 7.75 – 7.71 (m, 3H), 7.68 – 7.66 (m, 1H), 7.55 – 7.44 (m, 6H), 7.42 – 7.38 (m, 1H), 7.35 (d, *J* = 7.4 Hz, 2H), 7.32 – 7.26 (m, 2H), 7.20 (t, *J* = 7.5 Hz, 2H), 7.13 (t, *J* = 7.3 Hz, 1H), 6.82 (s, 1H); <sup>13</sup>C NMR (101 MHz, CDCl<sub>3</sub>) δ 169.9, 145.6, 141.4, 139.8, 138.3, 133.8, 133.1, 131.0, 129.4, 129.1, 128.5, 128.4, 128.3, 127.7, 127.3, 127.0, 124.3, 123.2, 120.9, 114.2, 109.5.

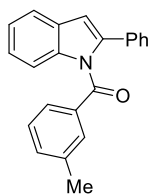

**(2-phenyl-1*H*-indol-1-yl)(*m*-tolyl)methanone (3ai).**<sup>4</sup> Yellow oil, 41.7 mg, 67% yield; <sup>1</sup>H NMR (400 MHz, CDCl<sub>3</sub>) δ 7.72 – 7.70 (m, 1H), 7.67 – 7.64 (m, 1H), 7.48 (d, *J* = 7.4 Hz, 1H), 7.42 (s, 1H), 7.33 – 7.25 (m, 4H), 7.22 – 7.12 (m, 5H), 6.79 (s, 1H), 2.27 (s, 3H); <sup>13</sup>C NMR (101 MHz,

CDCl<sub>3</sub>)  $\delta$  170.3, 141.4, 138.4, 138.1, 135.0, 133.7, 133.3, 131.0, 129.3, 128.4, 128.2, 127.6, 124.3, 123.2, 120.8, 114.2, 109.5, 21.2.

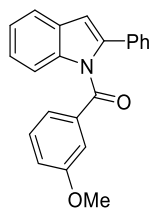

**(3-methoxyphenyl)(2-phenyl-1H-indol-1-yl)methanone (3aj).**<sup>5</sup> Yellow oil, 36.0 mg, 55% yield; <sup>1</sup>H NMR (400 MHz, CDCl<sub>3</sub>)  $\delta$  7.71 – 7.63 (m, 2H), 7.32 (d,  $J$  = 7.2 Hz, 2H), 7.28 – 7.26 (m, 2H), 7.23 – 7.13 (m, 6H), 6.94 (dd,  $J$  = 8.1, 2.4 Hz, 1H), 6.79 (s, 1H), 3.75 (s, 3H). <sup>13</sup>C NMR (101 MHz, CDCl<sub>3</sub>)  $\delta$  170.0, 159.4, 141.4, 138.3, 136.4, 133.2, 129.5, 129.4, 128.34, 128.29, 127.7, 124.3, 123.2, 123.0, 120.8, 119.6, 114.6, 114.2, 109.6, 55.5.

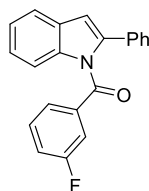

**(3-fluorophenyl)(2-phenyl-1H-indol-1-yl)methanone (3ak).**<sup>4</sup> Yellow oil, 45.4 mg, 72% yield; <sup>1</sup>H NMR (400 MHz, CDCl<sub>3</sub>)  $\delta$  7.85 – 7.83 (m, 1H), 7.66 (dd,  $J$  = 5.9, 2.8 Hz, 1H), 7.37 – 7.35 (m, 1H), 7.34 – 7.26 (m, 5H), 7.21 – 7.12 (m, 4H), 7.05 (td,  $J$  = 8.3, 1.7 Hz, 1H), 6.79 (s, 1H); <sup>13</sup>C NMR (101 MHz, CDCl<sub>3</sub>)  $\delta$  168.9, 162.2 (d,  $J$  = 248.3 Hz, 1C), 141.0, 138.3, 137.4 (d,  $J$  = 7.1 Hz, 1C), 133.0, 130.0 (d,  $J$  = 7.8 Hz, 1C), 129.4, 128.5, 128.4, 127.8, 126.0 (d,  $J$  = 2.9 Hz, 1C), 124.7, 123.6, 120.9, 119.7 (d,  $J$  = 21.3 Hz, 1C), 117.1 (d,  $J$  = 23.2 Hz, 1C), 114.3, 110.0.

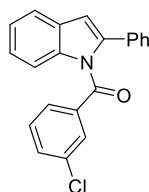

**(3-chlorophenyl)(2-phenyl-1H-indol-1-yl)methanone (3al).**<sup>4</sup> Yellow oil, 34.5 mg, 52% yield; <sup>1</sup>H NMR (400 MHz, CDCl<sub>3</sub>)  $\delta$  7.89 – 7.87 (m, 1H), 7.67 – 7.65 (m, 1H), 7.50 – 7.46 (m, 2H), 7.33 – 7.26 (m, 5H), 7.21 – 7.11 (m, 4H), 6.78 (s, 1H); <sup>13</sup>C NMR (101 MHz, CDCl<sub>3</sub>)  $\delta$  168.7, 141.0, 138.3,



136.9, 134.3, 133.0, 132.5, 130.3, 129.6, 129.4, 128.5, 128.4, 128.3, 127.9, 124.8, 123.7, 120.9, 114.4, 110.1.

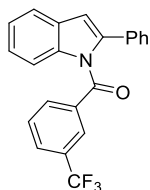

**(2-phenyl-1*H*-indol-1-yl)(3-(trifluoromethyl)phenyl)methanone (3am).**<sup>5</sup> Yellow oil, 37.3 mg, 51% yield; <sup>1</sup>H NMR (400 MHz, CDCl<sub>3</sub>)  $\delta$  8.03 (d,  $J = 7.6$  Hz, 1H), 7.77 (d,  $J = 7.8$  Hz, 1H), 7.70 – 7.66 (m, 2H), 7.54 (d,  $J = 7.8$  Hz, 1H), 7.40 – 7.32 (m, 3H), 7.24 – 7.22 (m, 2H), 7.15 – 7.06 (m, 3H), 6.79 (s, 1H); <sup>13</sup>C NMR (101 MHz, CDCl<sub>3</sub>)  $\delta$  168.7, 140.7, 138.3, 136.2, 133.2, 132.9, 130.6 (q,  $J = 33.1$  Hz, 1C), 129.4, 128.9, 128.8 (q,  $J = 3.6$  Hz, 1C), 128.7, 128.4, 127.9, 127.1 (q,  $J = 3.5$  Hz, 1C), 125.0, 123.9, 123.4 (q,  $J = 272.4$  Hz, 1C), 121.0, 114.5, 110.4.

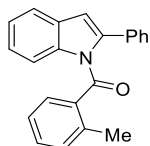

**(2-phenyl-1*H*-indol-1-yl)(*o*-tolyl)methanone (3an).**<sup>4</sup> Yellow oil, 26.2 mg, 42% yield; <sup>1</sup>H NMR (400 MHz, CDCl<sub>3</sub>)  $\delta$  7.75 – 7.72 (m, 1H), 7.66 – 7.62 (m, 1H), 7.32 – 7.27 (m, 4H), 7.22 – 7.13 (m, 5H), 7.07 (d,  $J = 7.9$  Hz, 1H), 7.02 (t,  $J = 7.5$  Hz, 1H), 6.73 (s, 1H), 2.38 (s, 3H); <sup>13</sup>C NMR (101 MHz, CDCl<sub>3</sub>)  $\delta$  170.4, 141.2, 138.1, 138.0, 135.6, 133.4, 131.5, 131.1, 129.8, 129.5, 128.4, 128.0, 127.7, 125.6, 124.7, 123.5, 120.8, 114.5, 110.5, 19.8.

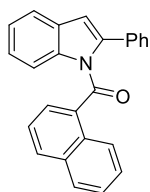

**naphthalen-1-yl(2-phenyl-1*H*-indol-1-yl)methanone (3ao).**<sup>5</sup> Yellow oil, 42.3 mg, 61% yield; <sup>1</sup>H NMR (400 MHz, CDCl<sub>3</sub>)  $\delta$  8.04 – 7.98 (m, 2H), 7.74 – 7.72 (m, 2H), 7.66 – 7.64 (m, 1H), 7.52 – 7.44 (m, 3H), 7.33 – 7.21 (m, 2H), 7.21 (t,  $J = 7.7$  Hz, 1H), 7.08 – 7.06 (m, 2H), 6.88 – 6.85 (m, 3H), 6.69 (s, 1H); <sup>13</sup>C NMR (101 MHz, CDCl<sub>3</sub>)  $\delta$  169.9, 141.5, 138.2, 133.4, 133.2, 133.0, 132.4,

131.0, 129.5, 129.3, 128.4, 128.3, 127.8, 127.6, 127.3, 126.5, 125.1, 124.8, 124.3, 123.7, 120.8, 115.1, 110.5.

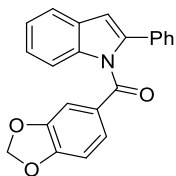

**benzo[d][1,3]dioxol-5-yl(2-phenyl-1H-indol-1-yl)methanone (3ap).** Yellow oil, 41.6 mg, 61% yield;  $^1\text{H}$ NMR (400 MHz,  $\text{CDCl}_3$ )  $\delta$  7.63 – 7.57 (m, 2H), 7.31 (d,  $J$  = 7.2 Hz, 2H), 7.23 – 7.13 (m, 7H), 6.75 (s, 1H), 6.63 (d,  $J$  = 8.1 Hz, 1H), 5.95 (s, 2H);  $^{13}\text{C}$  NMR (101 MHz,  $\text{CDCl}_3$ )  $\delta$  169.1, 151.9, 147.9, 141.4, 138.4, 133.1, 129.3, 129.0, 128.4, 128.2, 127.7, 127.0, 124.1, 123.0, 120.9, 113.9, 110.3, 109.0, 108.0, 102.0; HRMS (ESI-TOF) Calcd. for  $\text{C}_{22}\text{H}_{16}\text{NO}_3^+$   $[\text{M}+\text{H}]^+$ : 342.1125; found: 342.1127.

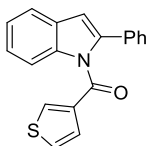

**(2-phenyl-1H-indol-1-yl)(thiophen-3-yl)methanone (3aq).**<sup>5</sup> Yellow oil, 33.4 mg, 55% yield;  $^1\text{H}$  NMR (400 MHz,  $\text{CDCl}_3$ )  $\delta$  7.84 – 7.80 (m, 1H), 7.72 (dd,  $J$  = 3.0, 1.2 Hz, 1H), 7.66 – 7.63 (m, 1H), 7.35 – 7.28 (m, 5H), 7.25 – 7.21 (m, 2H), 7.19 – 7.15 (m, 1H), 7.12 (dd,  $J$  = 5.1, 3.0 Hz, 1H), 6.79 (s, 1H);  $^{13}\text{C}$  NMR (101 MHz,  $\text{CDCl}_3$ )  $\delta$  164.4, 140.9, 138.3, 137.8, 134.5, 133.2, 129.2, 128.5, 128.4, 128.2, 127.7, 126.2, 124.4, 123.2, 120.9, 114.0, 109.5.

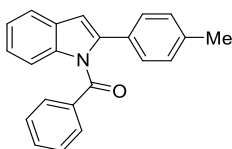

**phenyl(2-(p-tolyl)-1H-indol-1-yl)methanone (3ba).**<sup>4</sup> Yellow solid, 36.1 mg, 58% yield, mp 114.3 – 117.5 °C;  $^1\text{H}$  NMR (400 MHz,  $\text{CDCl}_3$ )  $\delta$  7.76 – 7.70 (m, 4H), 7.53 (t,  $J$  = 7.5 Hz, 1H), 7.40 – 7.30 (m, 6H), 7.11 (d,  $J$  = 7.9 Hz, 2H), 6.85 (s, 1H), 2.36 (s, 3H);  $^{13}\text{C}$  NMR (101 MHz,  $\text{CDCl}_3$ )  $\delta$  170.3, 141.6, 138.2, 137.5, 135.2, 132.9, 130.4, 130.2, 129.5, 129.0, 128.4, 128.3, 124.1, 123.1, 120.7, 114.1, 109.1, 21.3.

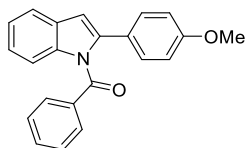

**(2-(4-methoxyphenyl)-1H-indol-1-yl)(phenyl)methanone (3ca).**<sup>4</sup> Yellow oil, 35.4 mg, 54% yield; <sup>1</sup>H NMR (400 MHz, CDCl<sub>3</sub>)  $\delta$  7.66 – 7.62 (m, 4H), 7.43 – 7.39 (m, 1H), 7.29 – 7.21 (m, 6H), 6.75 – 6.71 (m, 3H), 3.74 (s, 3H); <sup>13</sup>C NMR (101 MHz, CDCl<sub>3</sub>)  $\delta$  170.3, 159.1, 141.2, 138.2, 135.2, 133.0, 130.4, 129.7, 129.5, 128.4, 125.7, 124.0, 123.1, 120.6, 114.1, 113.8, 55.4.

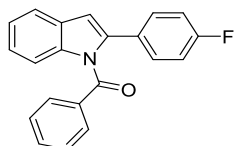

**(2-(4-fluorophenyl)-1H-indol-1-yl)(phenyl)methanone (3da).**<sup>4</sup> Yellow solid, 37.8 mg, 60% yield, mp 117.9 – 120.2 °C; <sup>1</sup>H NMR (400 MHz, CDCl<sub>3</sub>)  $\delta$  7.67 – 7.61 (m, 4H), 7.46 – 7.42 (m, 1H), 7.31 – 7.24 (m, 6H), 6.92 – 6.86 (m, 2H), 6.75 (s, 1H); <sup>13</sup>C NMR (101 MHz, CDCl<sub>3</sub>)  $\delta$  170.1, 162.2 (d,  $J$  = 248.1 Hz, 1C), 140.2, 138.2, 135.1, 133.1, 130.3, 130.1 (d,  $J$  = 8.2 Hz, 1C), 129.4 (d,  $J$  = 3.3 Hz, 1C), 129.3, 128.5, 124.4, 123.3, 120.8, 115.4 (d,  $J$  = 21.8 Hz, 1C), 114.2, 109.7.

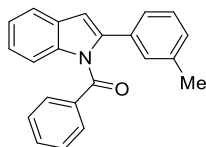

**phenyl(2-(*m*-tolyl)-1H-indol-1-yl)methanone (3ea).**<sup>4</sup> Yellow solid, 33.0 mg, 53% yield, mp 102.7 – 105.5 °C; <sup>1</sup>H NMR (400 MHz, CDCl<sub>3</sub>)  $\delta$  7.73 – 7.69 (m, 1H), 7.66 – 7.60 (m, 3H), 7.39 (t,  $J$  = 7.4 Hz, 1H), 7.29 – 7.23 (m, 5H), 7.12 – 7.04 (m, 3H), 6.92 (d,  $J$  = 7.4 Hz, 1H), 6.77 (s, 1H), 2.23 (s, 3H); <sup>13</sup>C NMR (101 MHz, CDCl<sub>3</sub>)  $\delta$  170.3, 141.5, 138.3, 137.8, 135.4, 133.0, 132.8, 130.2, 129.4, 129.3, 128.4, 128.3, 128.2, 125.6, 124.3, 123.2, 120.8, 114.2, 109.4, 21.4.

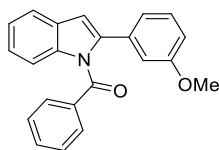

**(2-(3-methoxyphenyl)-1H-indol-1-yl)(phenyl)methanone (3fa).** Yellow oil, 41.9 mg, 64% yield; <sup>1</sup>H NMR (400 MHz, CDCl<sub>3</sub>)  $\delta$  7.74 – 7.71 (m, 1H), 7.66 – 7.62 (m, 3H), 7.42 – 7.39 (m, 1H), 7.30 –

7.25 (m, 4H), 7.10 (t,  $J = 7.9$  Hz, 1H), 6.90 (d,  $J = 7.7$  Hz, 1H), 6.85 – 6.84 (m, 1H), 6.79 (s, 1H), 6.69 – 6.66 (m, 1H), 3.74 (s, 3H);  $^{13}\text{C}$  NMR (101 MHz,  $\text{CDCl}_3$ )  $\delta$  170.2, 159.2, 141.1, 138.3, 135.2, 134.4, 132.9, 130.3, 129.4, 129.3, 128.3, 124.4, 123.3, 121.1, 120.9, 114.2, 114.0, 113.4, 109.6, 55.3; HRMS (ESI-TOF) Calcd. for  $\text{C}_{22}\text{H}_{18}\text{NO}_2^+$   $[\text{M}+\text{H}]^+$ : 328.1332; found: 328.1334.

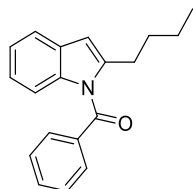

**(2-butyl-1H-indol-1-yl)(phenyl)methanone (3ga).**<sup>5</sup> Yellow oil, 34.9 mg, 63% yield;  $^1\text{H}$ NMR (400 MHz,  $\text{CDCl}_3$ )  $\delta$  7.74 – 7.72 (m, 2H), 7.64 (t,  $J = 7.5$  Hz, 1H), 7.50 (t,  $J = 7.8$  Hz, 3H), 7.13 (t,  $J = 7.4$  Hz, 1H), 7.01 – 6.97 (m, 1H), 6.86 (d,  $J = 8.3$  Hz, 1H), 6.48 (s, 1H), 2.86 – 2.82 (m, 2H), 1.66 – 1.57 (m, 2H), 1.39 – 1.26 (m, 2H), 0.89 (t,  $J = 7.4$  Hz, 3H);  $^{13}\text{C}$  NMR (101 MHz,  $\text{CDCl}_3$ )  $\delta$  170.1, 143.2, 137.4, 135.6, 133.2, 130.0, 129.6, 128.9, 122.6, 122.5, 120.1, 114.2, 107.4, 31.3, 28.7, 22.5, 14.0.

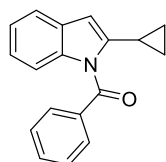

**(2-cyclopropyl-1H-indol-1-yl)(phenyl)methanone (3ha).**<sup>5</sup> Yellow oil, 30.3 mg, 58% yield;  $^1\text{H}$  NMR (400 MHz,  $\text{CDCl}_3$ )  $\delta$  7.76 – 7.74 (m, 2H), 7.61 (t,  $J = 7.5$  Hz, 1H), 7.51 – 7.46 (m, 3H), 7.29 (d,  $J = 8.2$  Hz, 1H), 7.16 (t,  $J = 7.4$  Hz, 1H), 7.11 – 7.07 (m, 1H), 6.33 (s, 1H), 1.84 – 1.78 (m, 1H), 0.76 – 0.66 (m, 4H);  $^{13}\text{C}$  NMR (101 MHz,  $\text{CDCl}_3$ )  $\delta$  170.3, 144.4, 137.5, 136.0, 132.8, 129.9, 129.3, 128.7, 123.3, 122.8, 120.1, 114.4, 106.0, 10.4, 8.5.

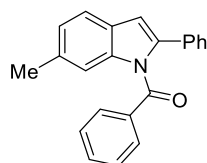

**(6-methyl-2-phenyl-1H-indol-1-yl)(phenyl)methanone (3ia).**<sup>6</sup> Yellow oil, 38.6 mg, 62% yield;  $^1\text{H}$  NMR (400 MHz,  $\text{CDCl}_3$ )  $\delta$  7.63 (s, 1H), 7.60 – 7.58 (m, 2H), 7.53 (d,  $J = 7.9$  Hz, 1H), 7.36 (t,  $J = 7.4$  Hz, 1H), 7.29 – 7.21 (m, 4H), 7.18 – 7.08 (m, 4H), 6.73 (s, 1H), 2.46 (s, 3H);  $^{13}\text{C}$  NMR (101

MHz, CDCl<sub>3</sub>)  $\delta$  170.3, 140.6, 138.8, 135.3, 134.5, 133.3, 132.8, 130.3, 128.4, 128.2, 127.4, 127.1, 124.8, 120.4, 114.4, 109.4, 22.1.

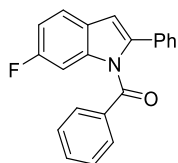

**(6-fluoro-2-phenyl-1H-indol-1-yl)(phenyl)methanone (3ja).** Yellow oil, 27.1 mg, 43% yield; <sup>1</sup>H NMR (400 MHz, CDCl<sub>3</sub>)  $\delta$  7.60 – 7.54 (m, 3H), 7.48 (d,  $J$  = 10.3 Hz, 1H), 7.39 (t,  $J$  = 7.4 Hz, 1H), 7.27 – 7.22 (m, 4H), 7.16 (t,  $J$  = 7.4 Hz, 2H), 7.13 – 7.09 (m, 1H), 7.04 (t,  $J$  = 8.4 Hz, 1H), 6.73 (s, 1H); <sup>13</sup>C NMR (101 MHz, CDCl<sub>3</sub>)  $\delta$  170.1, 160.9 (d,  $J$  = 240.5 Hz, 1C), 141.7 (d,  $J$  = 4.2 Hz, 1C), 138.5 (d,  $J$  = 12.4 Hz, 1C), 134.8, 133.1, 132.9, 130.3, 128.4, 128.3 (d,  $J$  = 0.7 Hz, 1C), 127.7, 125.6, 121.5 (d,  $J$  = 9.8 Hz, 1C), 111.7 (d,  $J$  = 24.2 Hz, 1C), 109.1, 101.6 (d,  $J$  = 28.4 Hz, 1C); HRMS (ESI-TOF) Calcd. for C<sub>21</sub>H<sub>14</sub>NFONa<sup>+</sup> [M+Na]<sup>+</sup>: 338.0952; found: 338.0954.

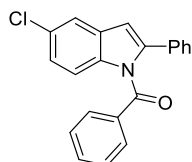

**(5-chloro-2-phenyl-1H-indol-1-yl)(phenyl)methanone (3ia).**<sup>6</sup> Yellow solid, mp 95.1 – 96.5 °C; 33.8 mg, 51% yield; <sup>1</sup>H NMR (400 MHz, CDCl<sub>3</sub>)  $\delta$  7.64 (d,  $J$  = 8.8 Hz, 1H), 7.61 – 7.58 (m, 3H), 7.39 (t,  $J$  = 7.5 Hz, 1H), 7.29 – 7.25 (m, 4H), 7.23 – 7.11 (m, 4H), 6.71 (s, 1H); <sup>13</sup>C NMR (101 MHz, CDCl<sub>3</sub>)  $\delta$  169.9, 142.6, 136.7, 134.8, 133.1, 132.6, 130.4, 130.3, 128.7, 128.5, 128.44, 128.37, 128.0, 124.5, 120.3, 115.2, 108.5.

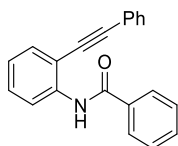

**N-(2-(phenylethynyl)phenyl)benzamide (4).**<sup>7</sup> White solid, 93% yield. mp 113.6 – 115.7 °C; <sup>1</sup>H NMR (400 MHz, CDCl<sub>3</sub>)  $\delta$  8.96 (s, 1H), 8.64 (d,  $J$  = 8.3 Hz, 1H), 7.97 (d,  $J$  = 7.5 Hz, 2H), 7.59 – 7.48 (m, 6H), 7.45 – 7.40 (m, 4H), 7.13 (t,  $J$  = 7.5 Hz, 1H); <sup>13</sup>C NMR (101 MHz, CDCl<sub>3</sub>)  $\delta$  165.2,

139.2, 135.1, 132.2, 131.7, 131.5, 130.1, 129.14, 129.05, 128.8, 127.1, 123.7, 122.4, 119.3, 112.4, 97.1, 84.6

## 6. References

1. Yu, L.-Z.; Wei, Y.; Shi, M. Copper-catalyzed trifluoromethylazidation and rearrangement of aniline-linked 1,7-enynes: access to CF<sub>3</sub>-substituted azaspirocyclic dihydroquinolin-2-ones and furoindolines. *Chem. Commun.* **2017**, *53*, 8980-8983.
2. DeRoy, P. L.; Surprenant, S.; Bertrand-Laperle, M.; Yoakim, C. Efficient nucleophilic aromatic substitution between aryl nitrofluorides and alkynes. *Org. Lett.* **2007**, *9*, 2741-2743.
3. Kim, J. S.; Han, J. H.; Lee, J. J.; Jun, Y. M.; Lee, B. M.; Kim, B. H. Indium-HI-mediated one-pot reaction of 1-(2-arylethynyl)-2-nitroarenes to 2-arylindoles *Tetrahedron Lett.* **2008**, *49*, 3733-3738.
4. Yao, L.; Shang, Y.; Wang, J.-S.; Pan, A.; Ying, J.; Wu, X.-F. Palladium-catalyzed carbonylative cyclization of 2-alkynylanilines and aryl iodides to access *N*-acylindoles. *Org. Chem. Front.* **2021**, *8*, 1926-1929.
5. Yao, L.; Ying, J.; Wu, X.-F. Nickel-catalyzed cascade carbonylative synthesis of *N*-benzoyl indoles from 2-nitroalkynes and aryl iodides. *Org. Chem. Front.* **2021**, *8*, 6541-6545.
6. Teders, M.; Pitzer, L.; Buss, S.; Glorius F. Regioselective synthesis of 2-substituted indoles from benzotriazoles and alkynes by photoinitiated denitrogenation. *ACS Catal.* **2017**, *7*, 4053-4056.
7. Saito, T.; Ogawa, S.; Takei, N.; Kutsumura, N.; Otani, T. Palladium-catalyzed highly regio- and stereoselective synthesis of 4-alkylidene-4*H*-3,1-benzoxazines from *N*-acyl-*o*-alkynylanilines. *Org. Lett.* **2011**, *13*, 1098-1101.

7.  $^1\text{H}$ ,  $^{13}\text{C}$  NMR spectra of 1f, 1i–k, 3aa–aq, 3ba–ka and 4

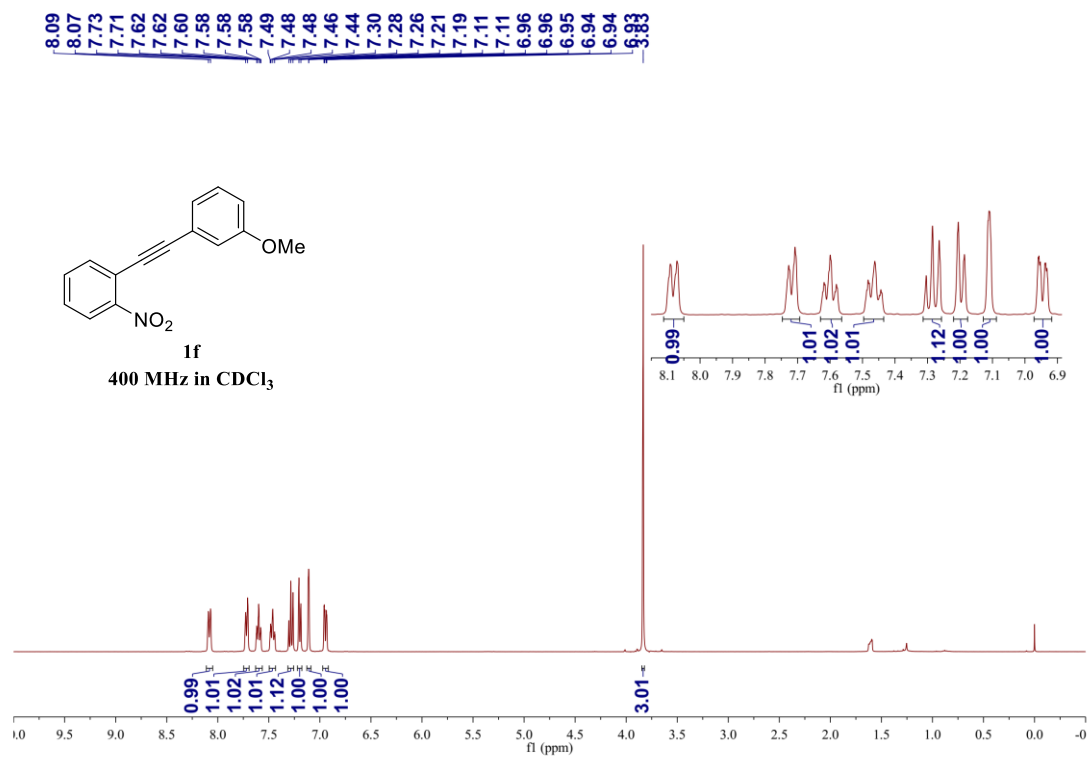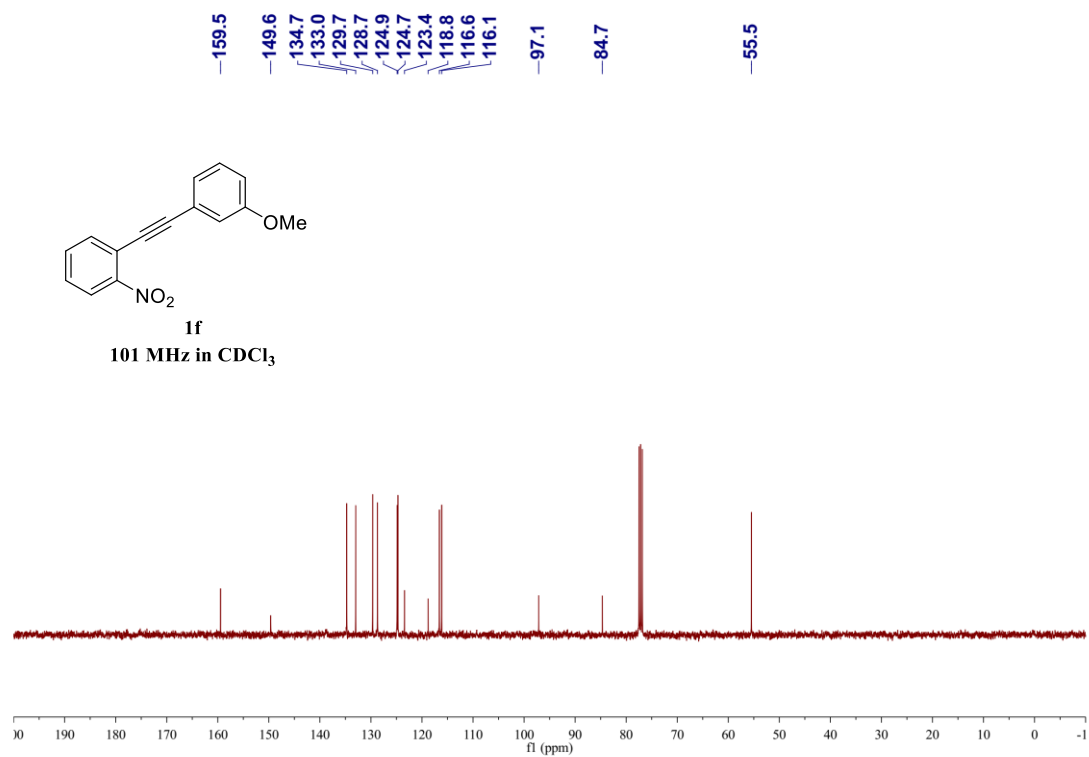

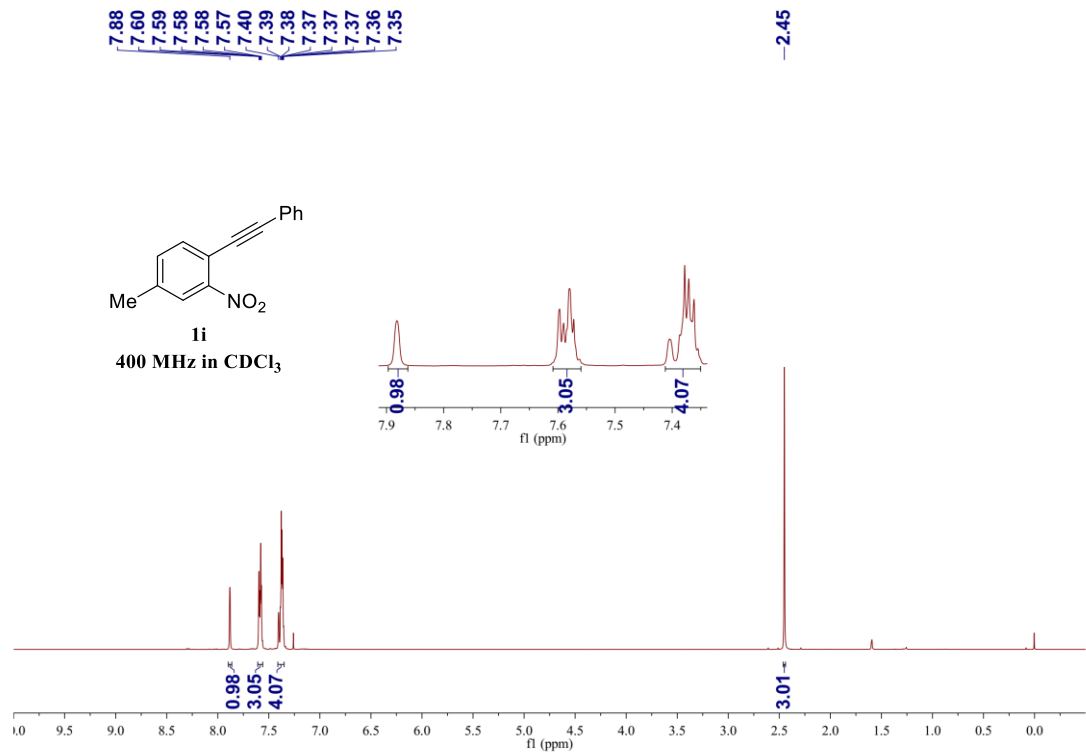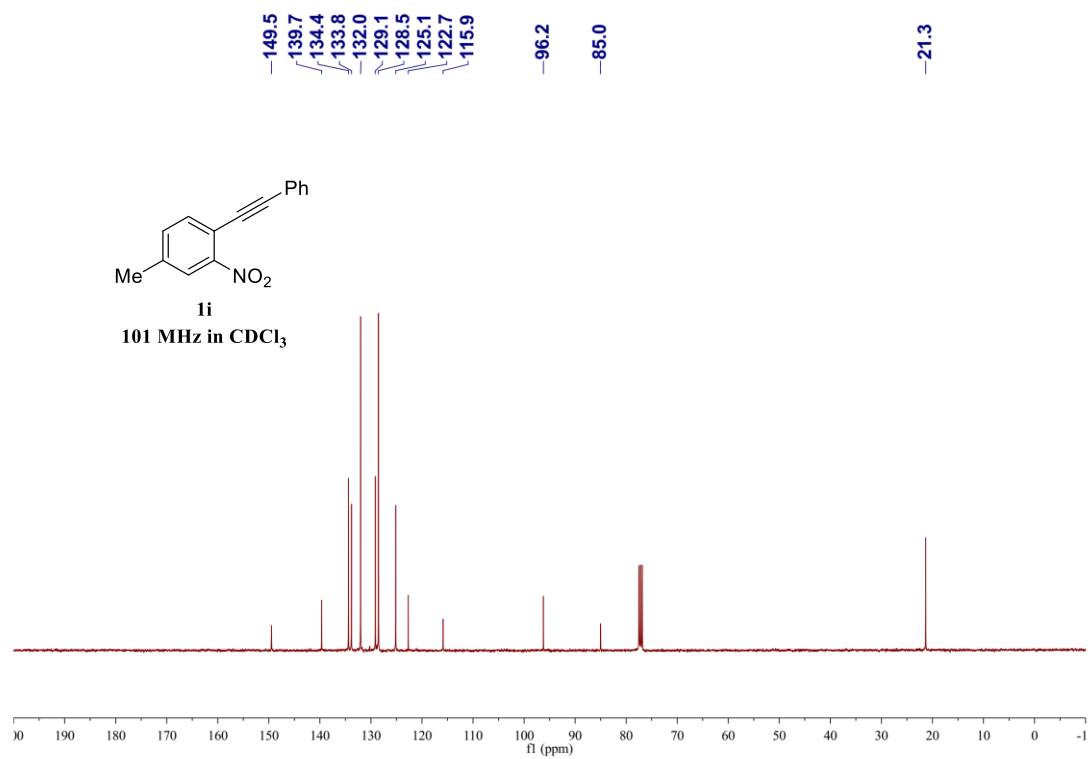



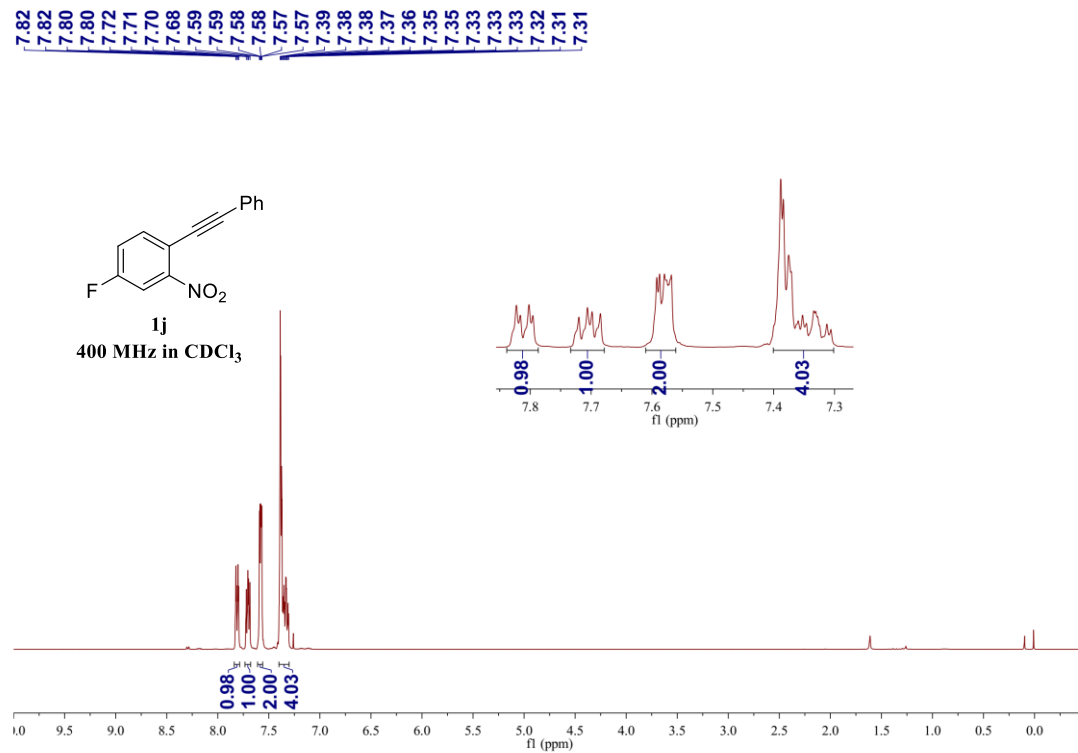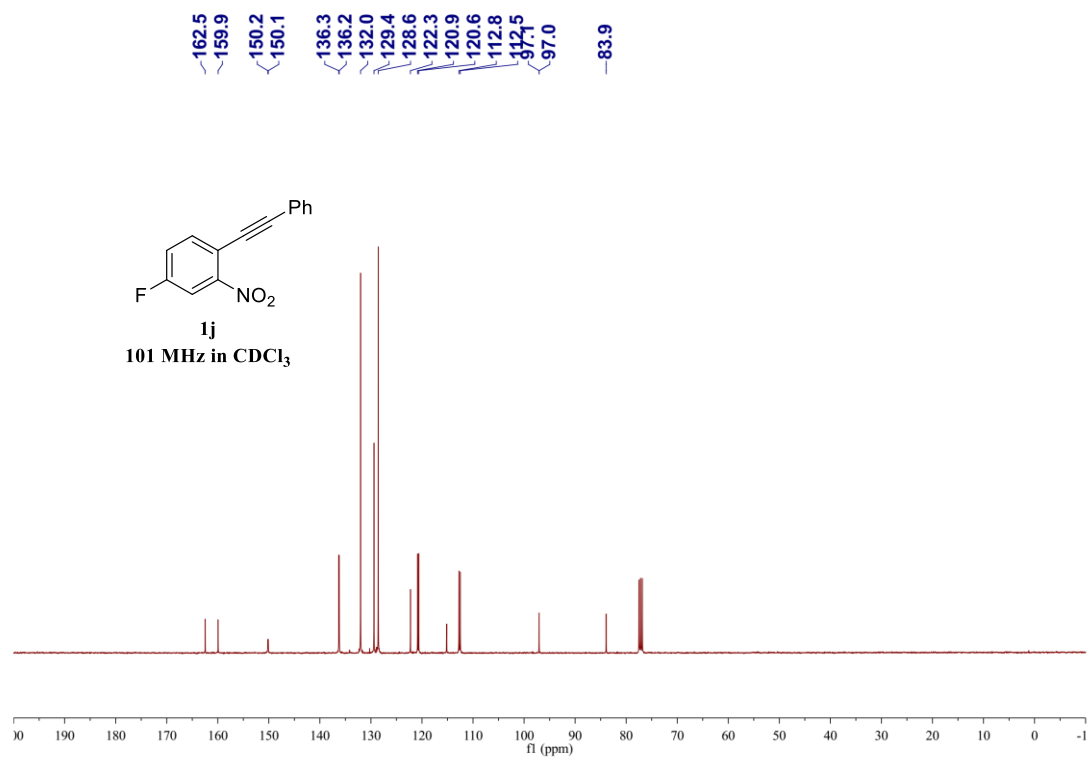

8.06  
8.04  
7.69  
7.68  
7.61  
7.60  
7.60  
7.59  
7.58  
7.43  
7.42  
7.41  
7.41  
7.40  
7.40  
7.39  
7.38  
7.37  
7.37  
7.36  
7.36

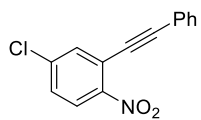

**1k**  
400 MHz in CDCl<sub>3</sub>

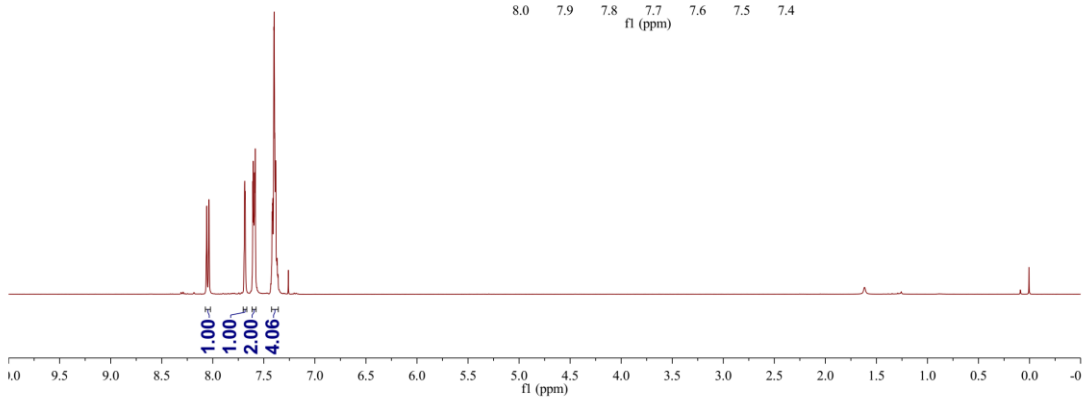

147.7  
139.4  
134.1  
132.2  
129.7  
128.7  
128.6  
126.2  
121.9  
120.5

98.7

84.0

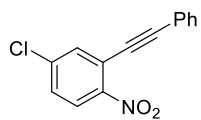

**1k**  
101 MHz in CDCl<sub>3</sub>

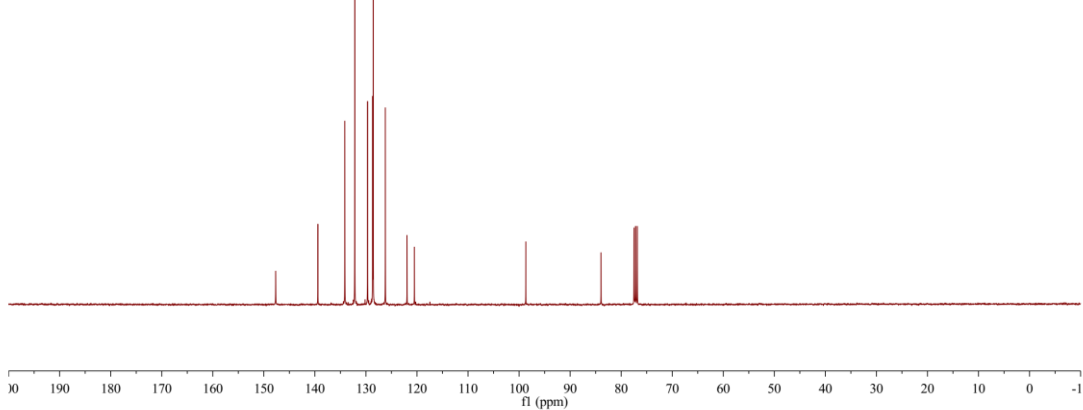

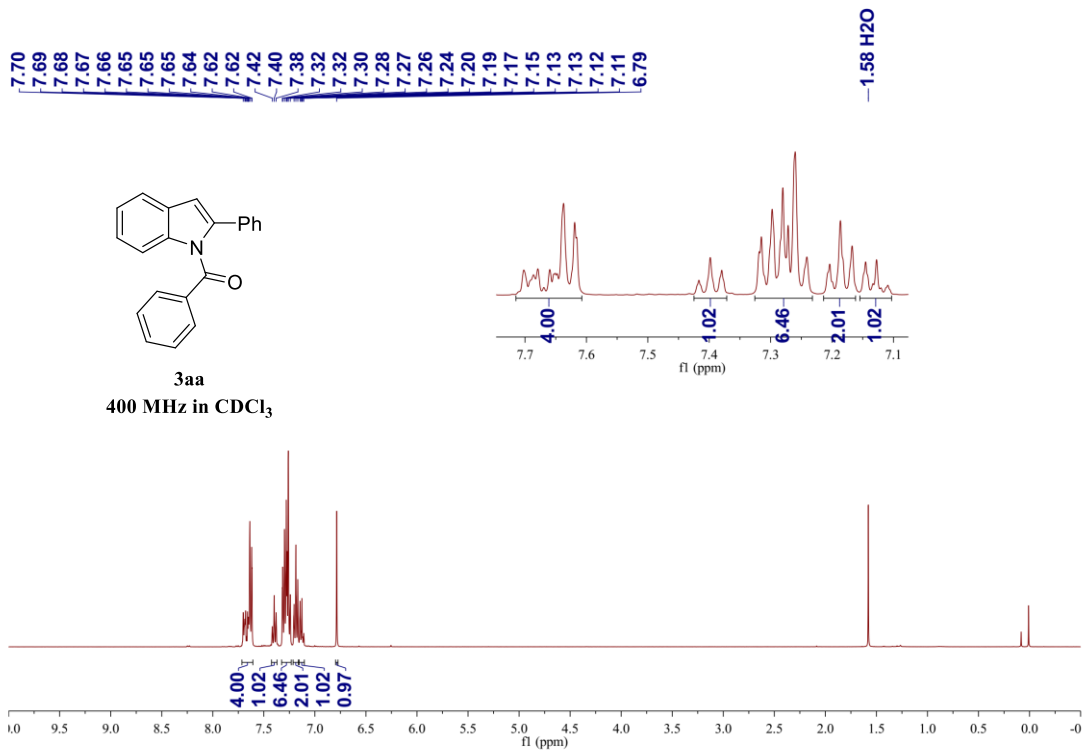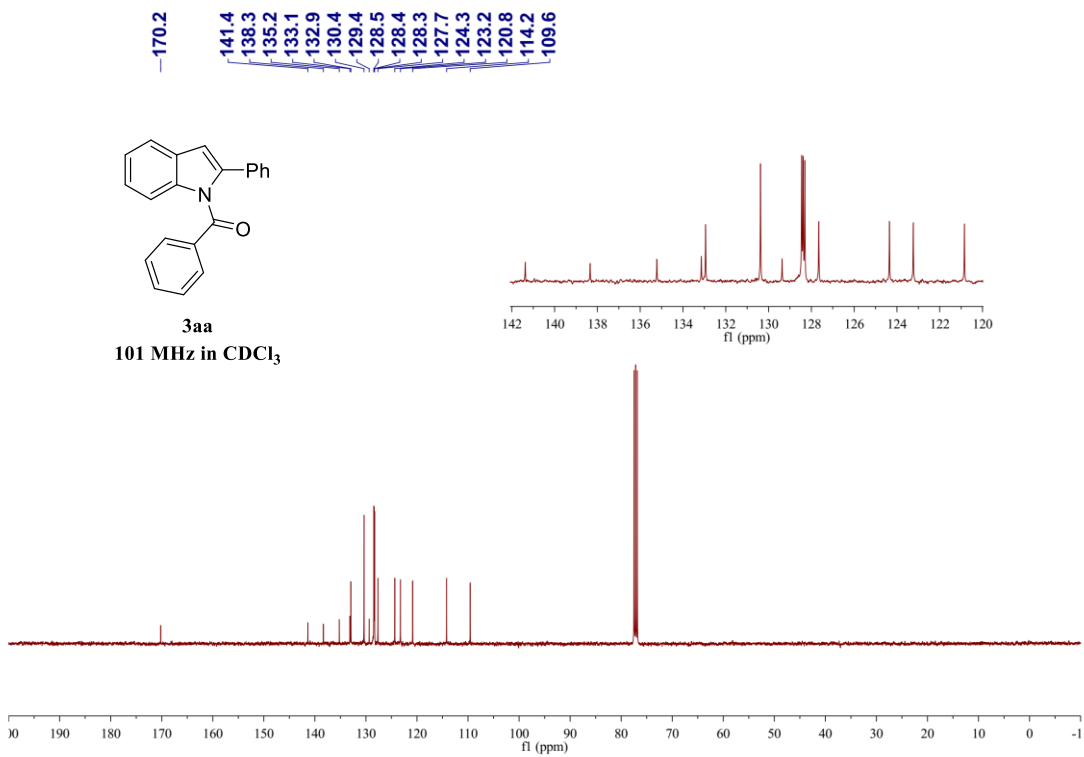

7.65  
7.63  
7.59  
7.57  
7.35  
7.33  
7.28  
7.26  
7.25  
7.24  
7.23  
7.22  
7.20  
7.18  
7.16  
7.14  
7.10  
7.08  
6.79

-2.34

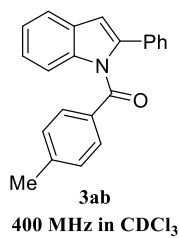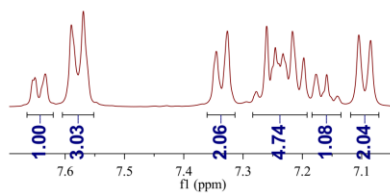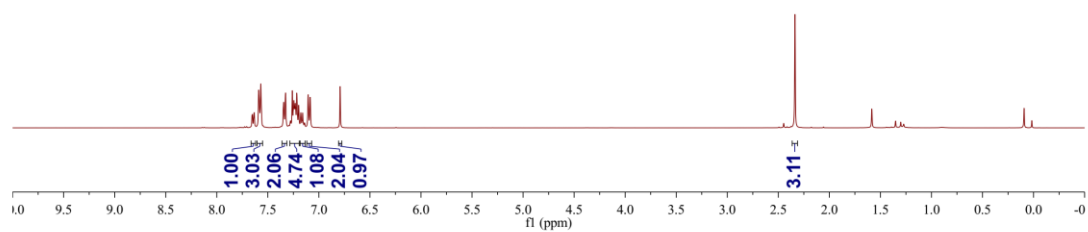

170.1  
144.0  
141.5  
138.3  
133.1  
132.3  
130.6  
129.4  
129.2  
128.3  
127.6  
124.1  
123.0  
120.8  
114.0  
109.2

-21.8

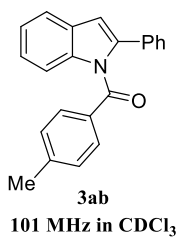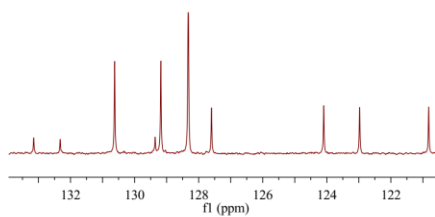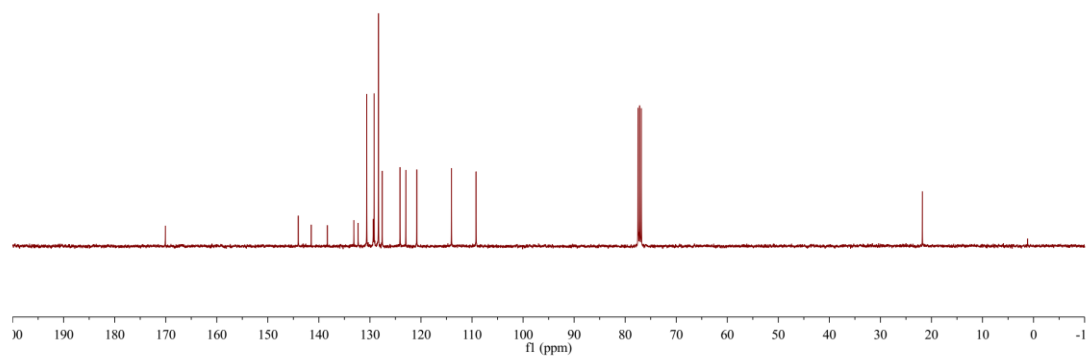

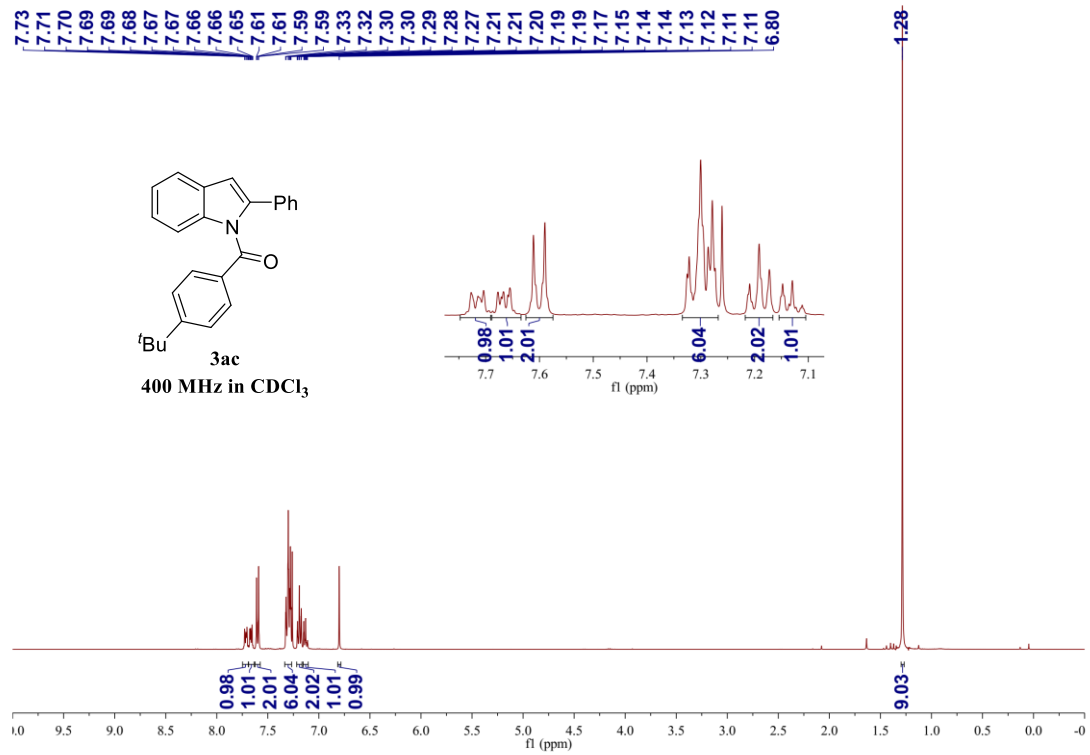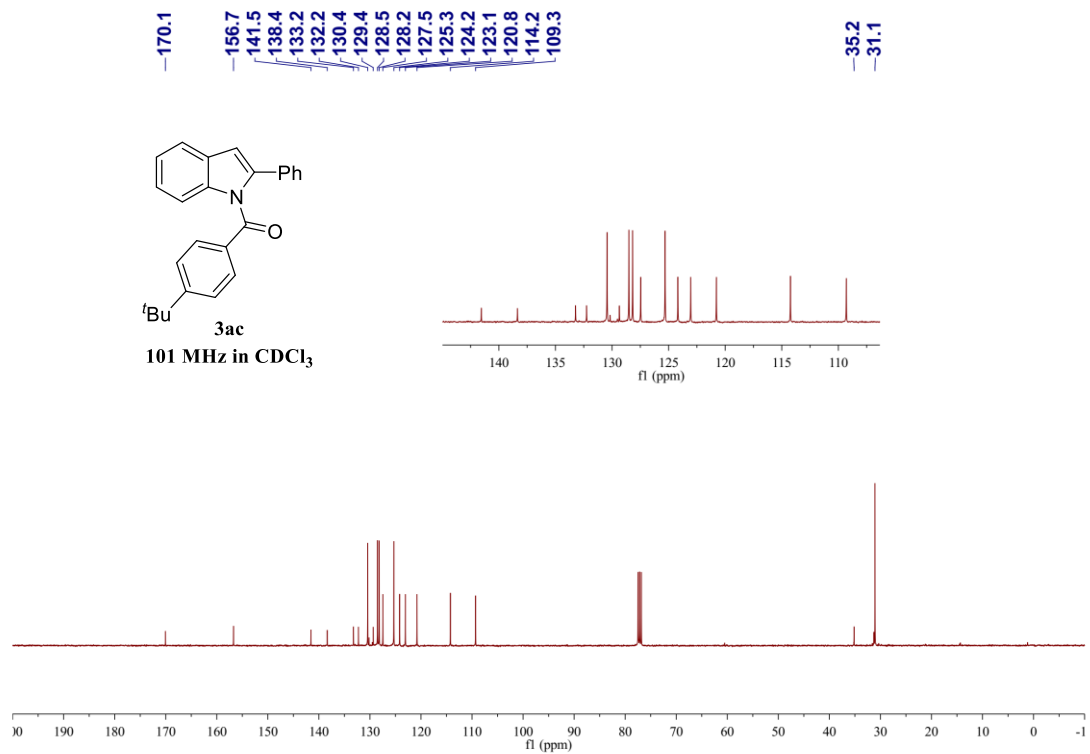

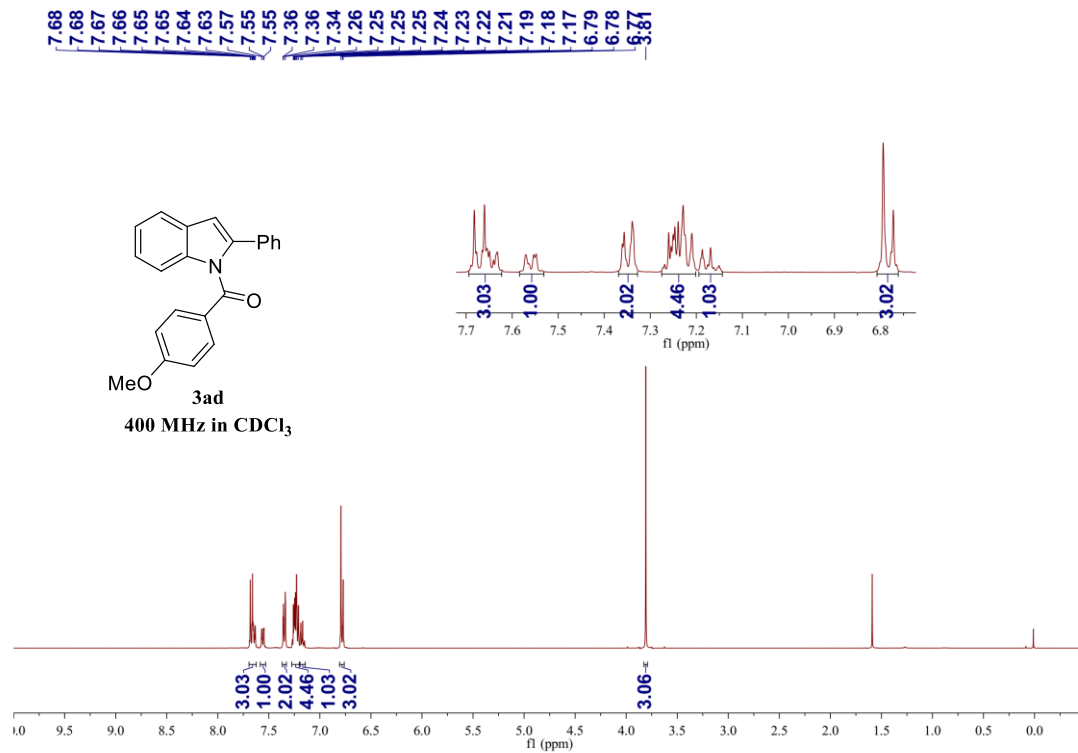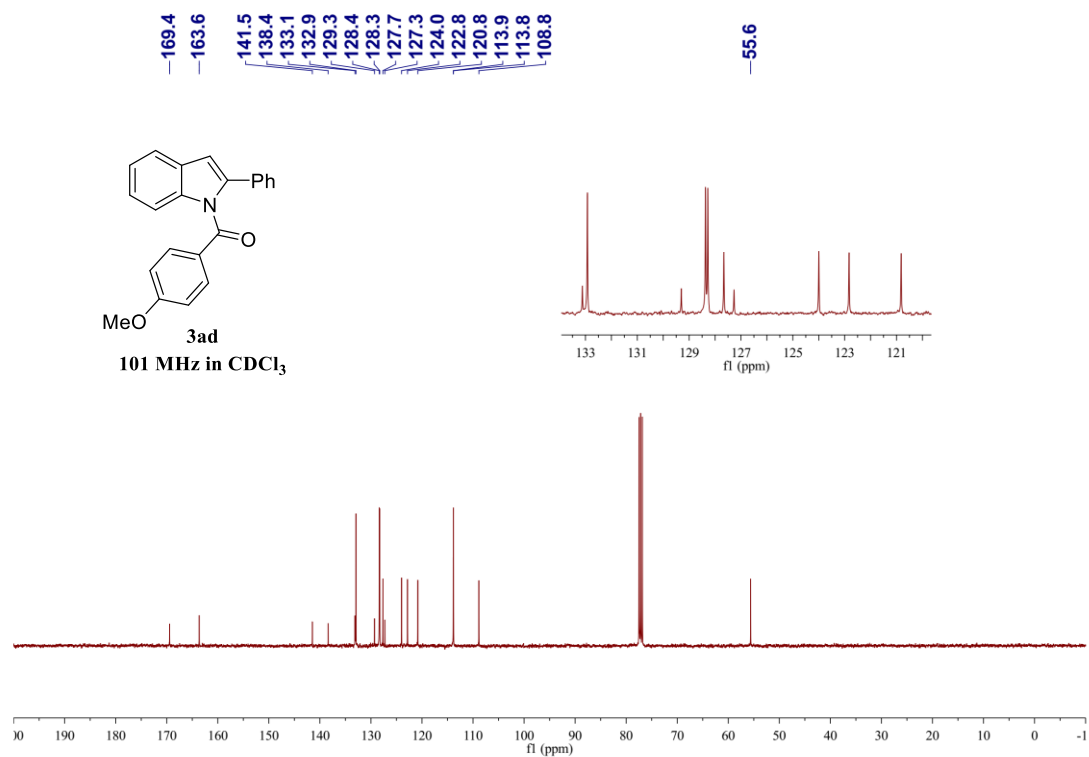

7.79  
7.78  
7.77  
7.76  
7.76  
7.75  
7.74  
7.67  
7.66  
7.65  
7.65  
7.63  
7.62  
7.61  
7.32  
7.31  
7.30  
7.30  
7.29  
7.28  
7.28  
7.22  
7.22  
7.21  
7.20  
7.18  
7.17  
7.17  
7.16  
7.15  
7.14  
7.13  
6.94  
6.92  
6.90  
6.79

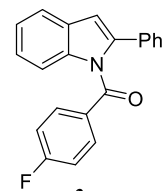

400 MHz in CDCl<sub>3</sub>

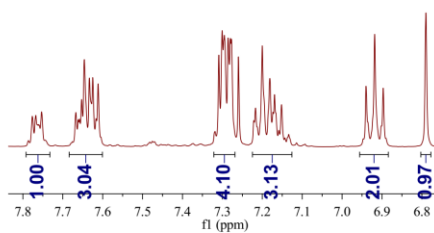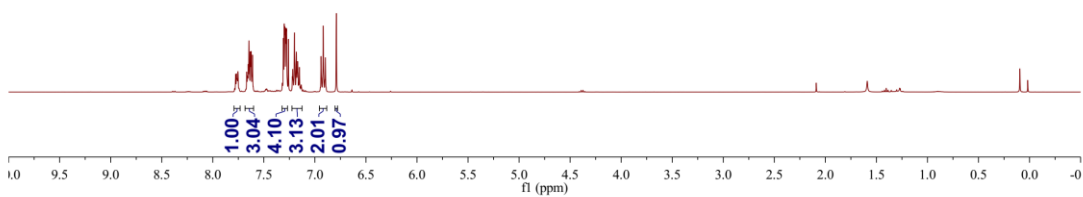

168.9  
166.6  
164.1  
141.1  
138.3  
133.0  
132.9  
131.4  
131.4  
129.3  
128.4  
128.4  
127.8  
124.5  
123.4  
120.9  
115.7  
115.5  
114.1  
109.6

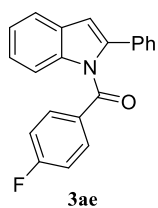

101 MHz in CDCl<sub>3</sub>

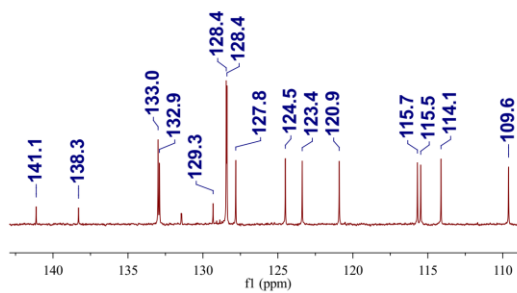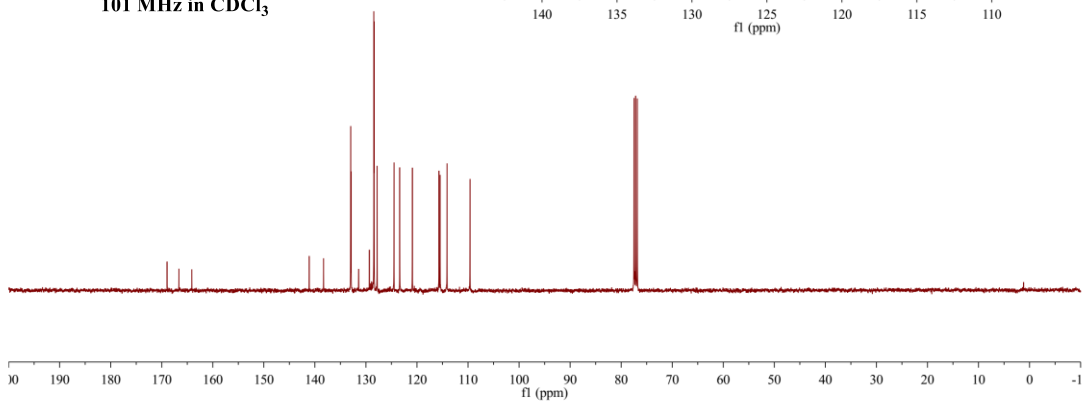

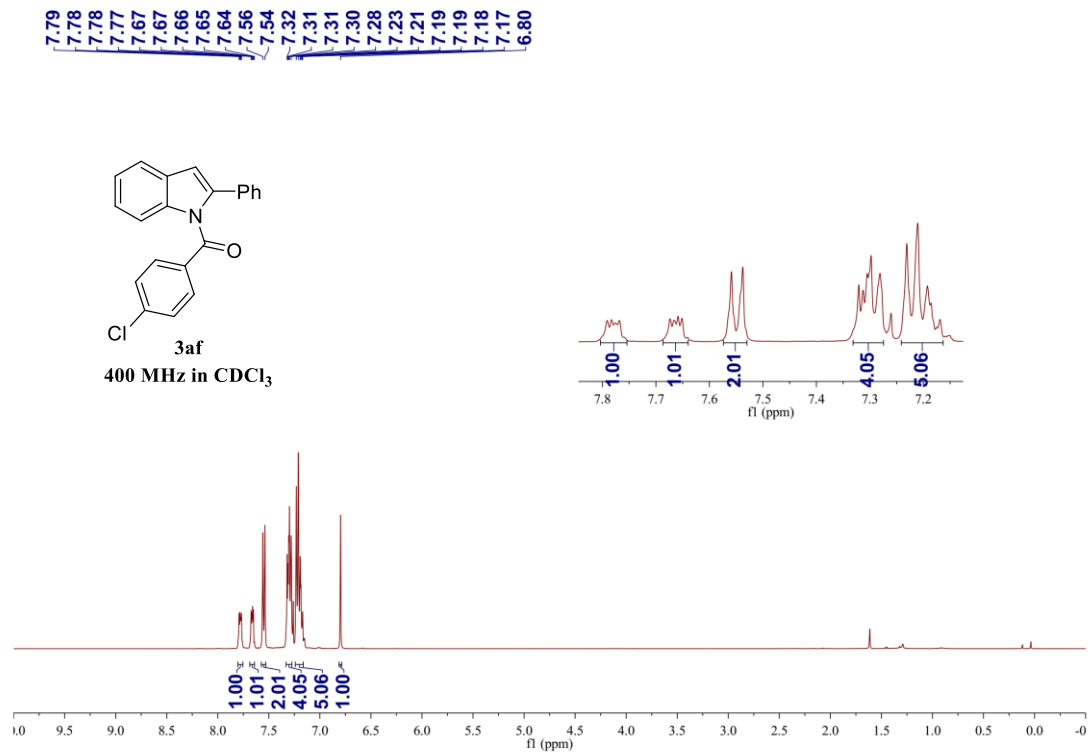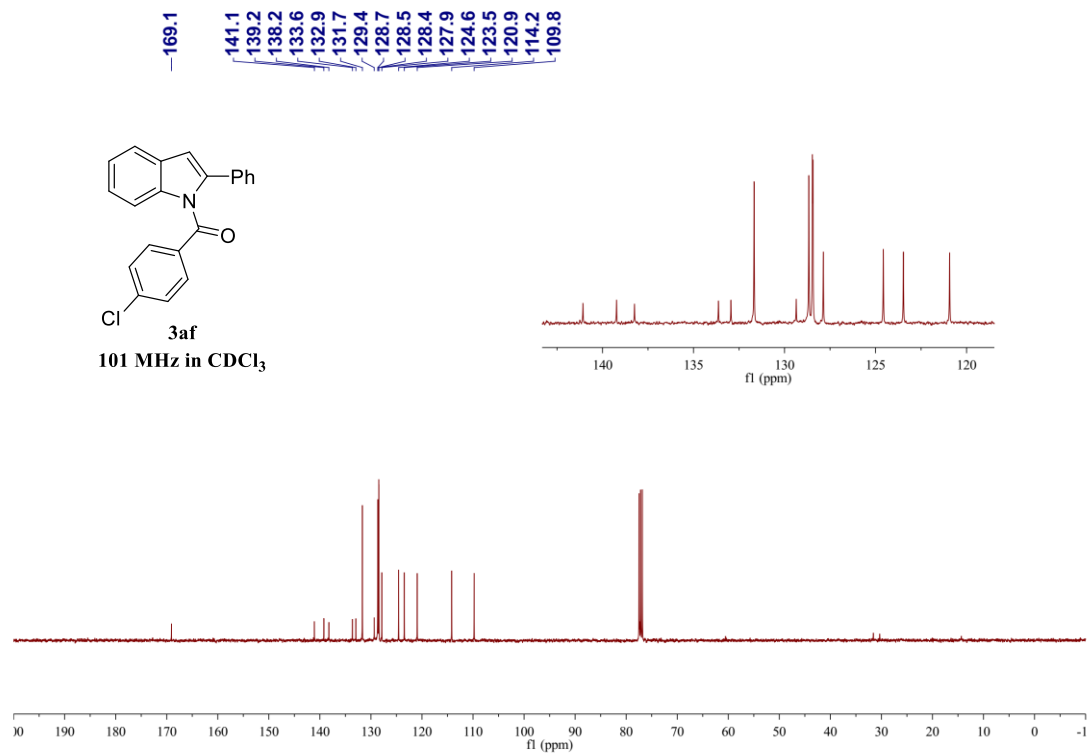



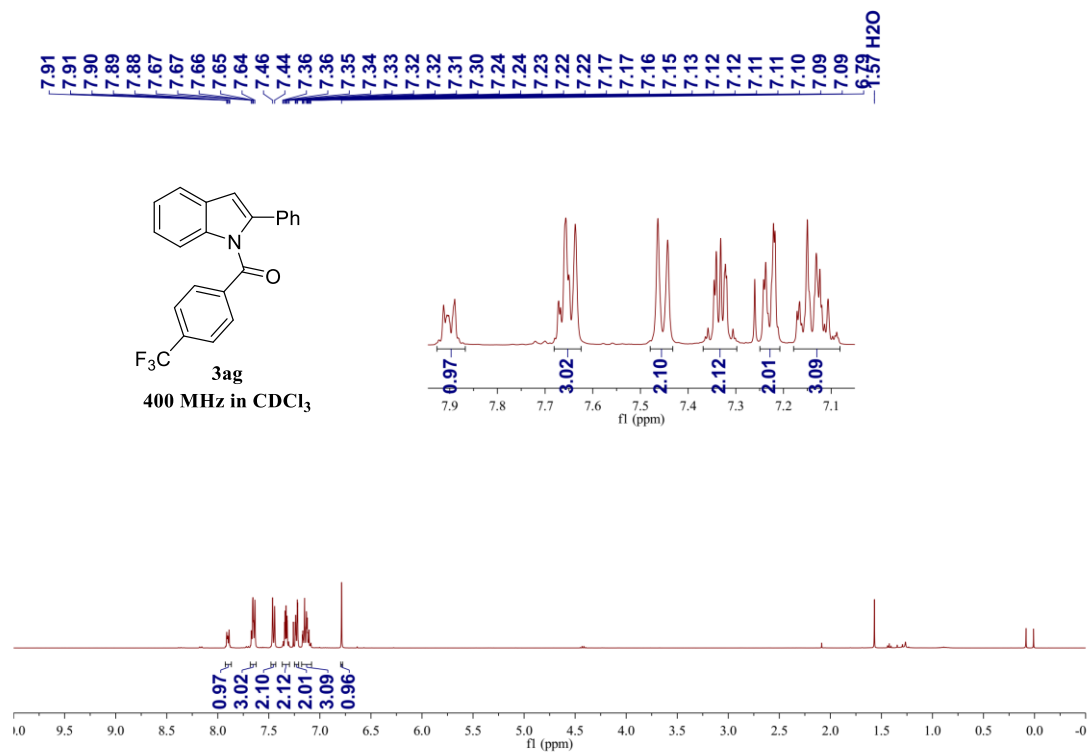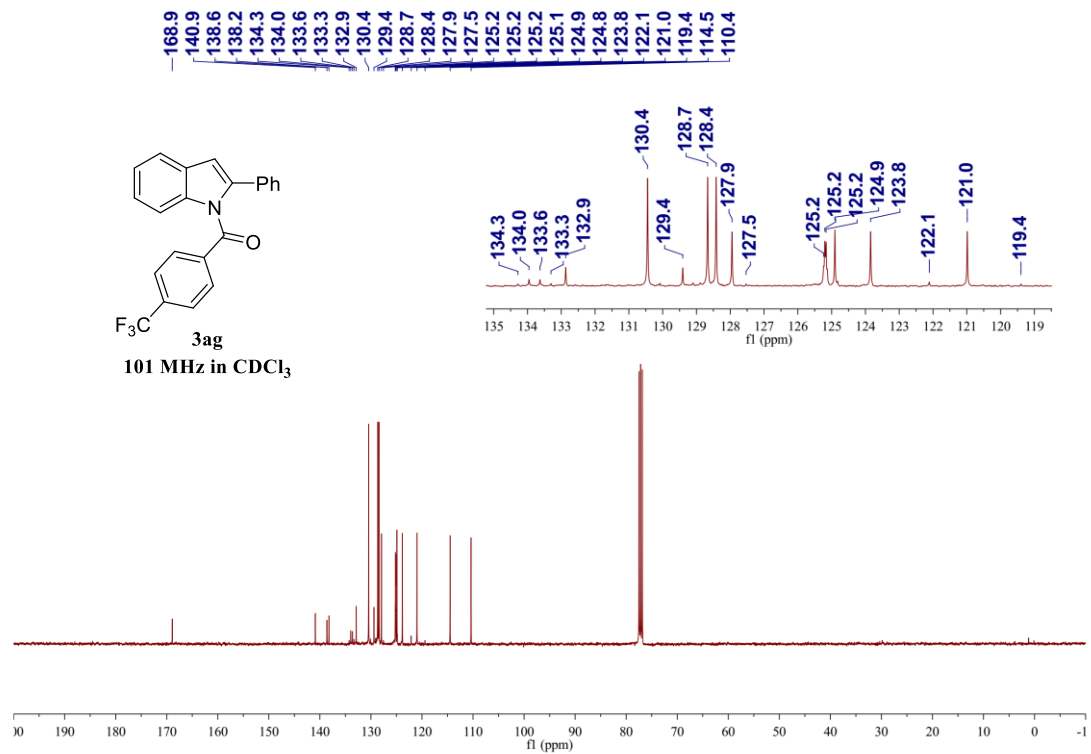

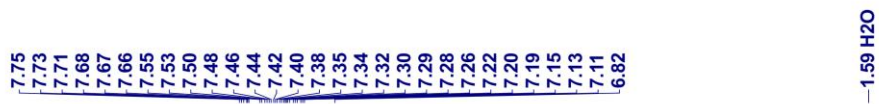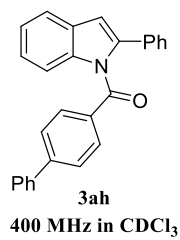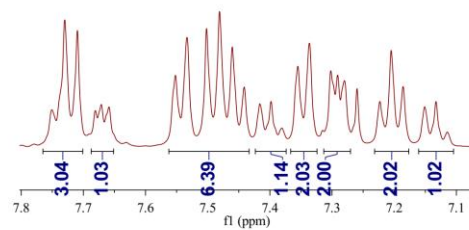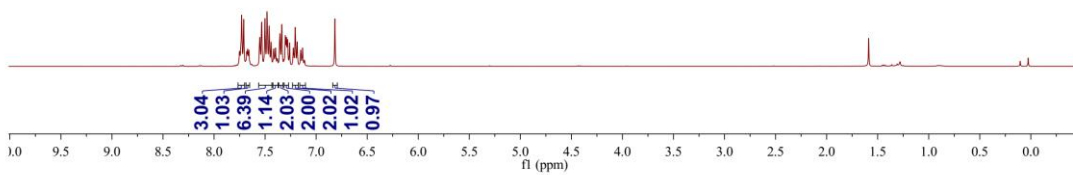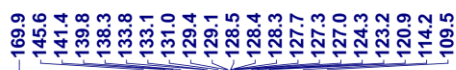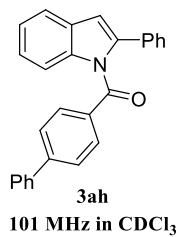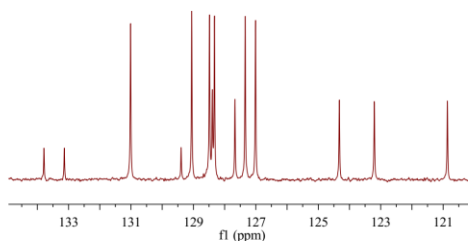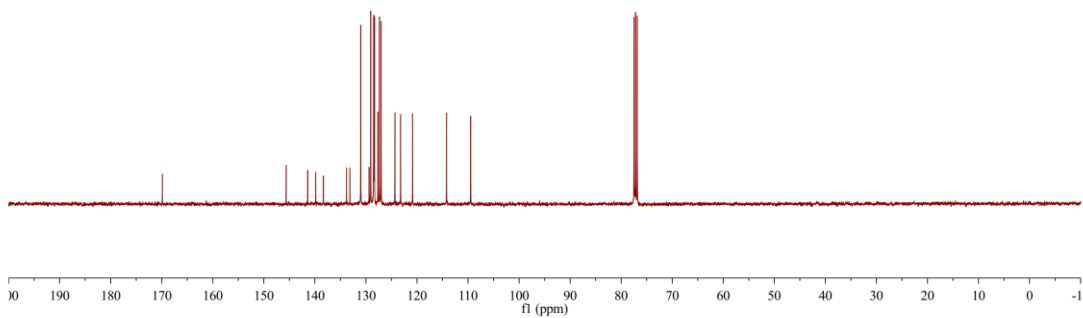

7.72  
7.70  
7.70  
7.67  
7.66  
7.64  
7.49  
7.47  
7.42  
7.33  
7.31  
7.29  
7.28  
7.27  
7.27  
7.26  
7.25  
7.22  
7.20  
7.20  
7.18  
7.16  
7.14  
7.14  
7.12  
6.79

-2.27

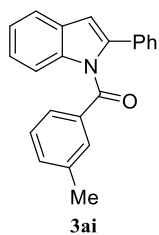

400 MHz in CDCl<sub>3</sub>

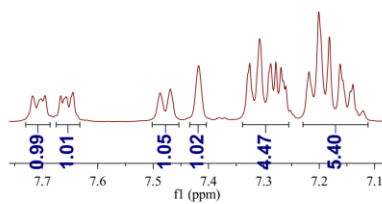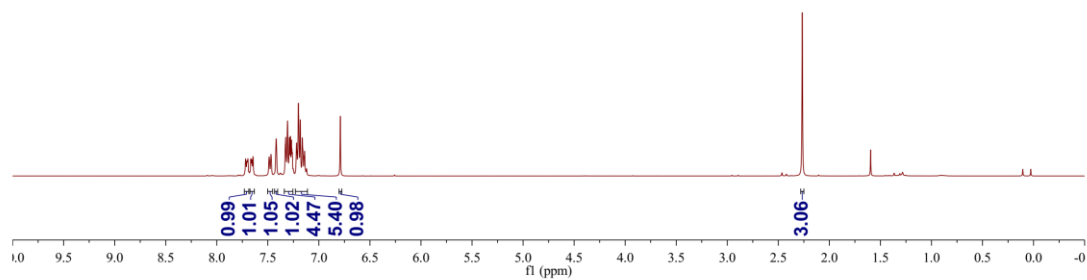

170.3  
141.4  
138.4  
138.1  
135.0  
133.7  
133.3  
131.0  
129.3  
128.4  
128.2  
127.6  
124.3  
123.2  
120.8  
114.2  
109.5

-21.2

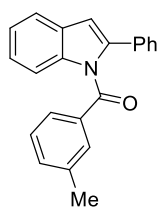

101 MHz in CDCl<sub>3</sub>

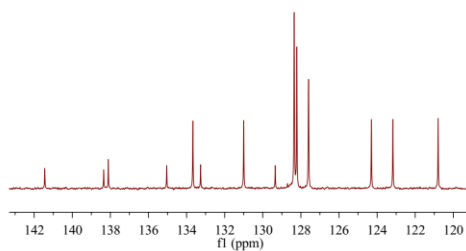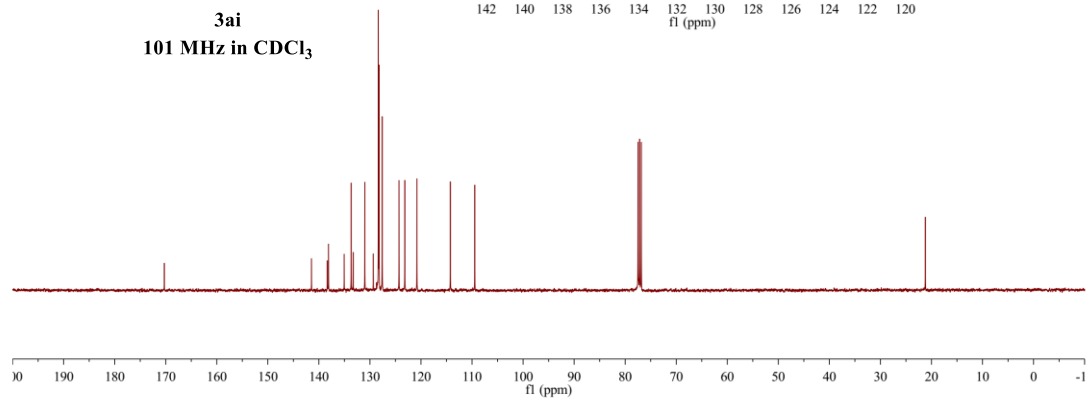

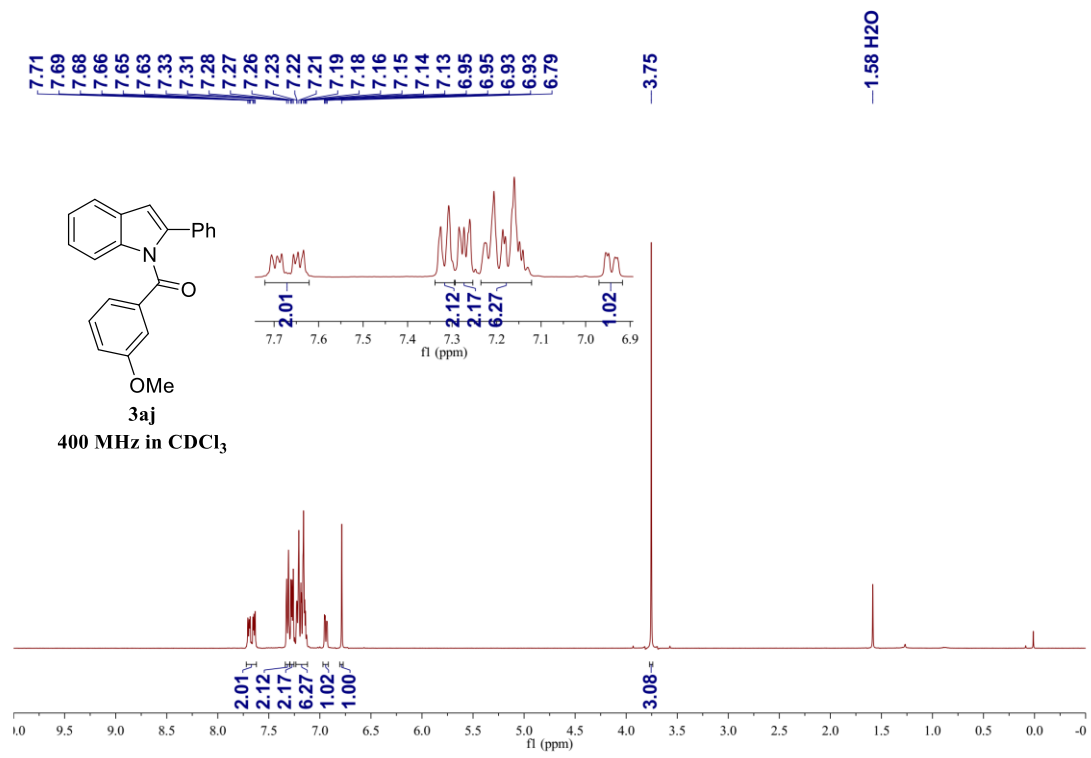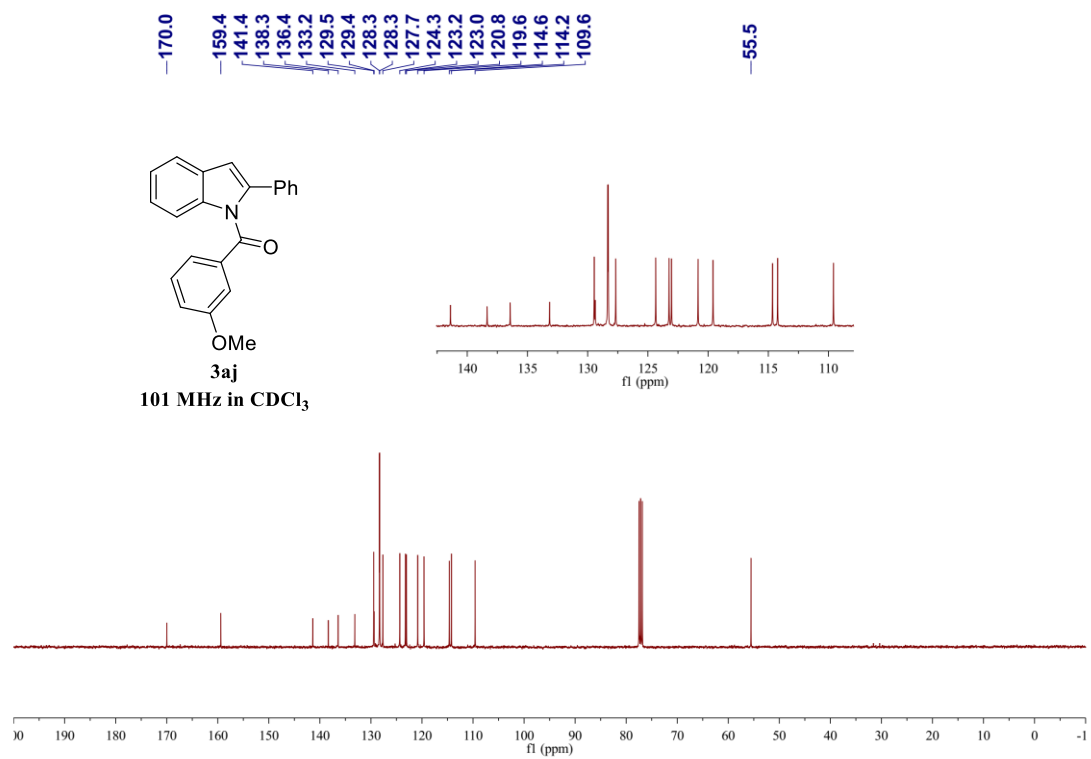

7.85  
7.84  
7.83  
7.67  
7.66  
7.65  
7.64  
7.37  
7.35  
7.34  
7.32  
7.32  
7.31  
7.31  
7.31  
7.30  
7.29  
7.29  
7.27  
7.26  
7.21  
7.21  
7.20  
7.19  
7.18  
7.17  
7.16  
7.15  
7.14  
7.13  
7.12  
7.07  
7.07  
7.05  
7.05  
7.03  
7.02  
6.79

1.58 H<sub>2</sub>O

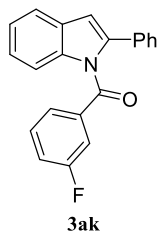

400 MHz in CDCl<sub>3</sub>

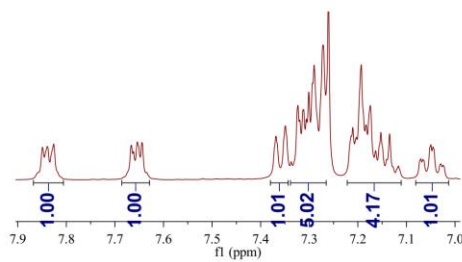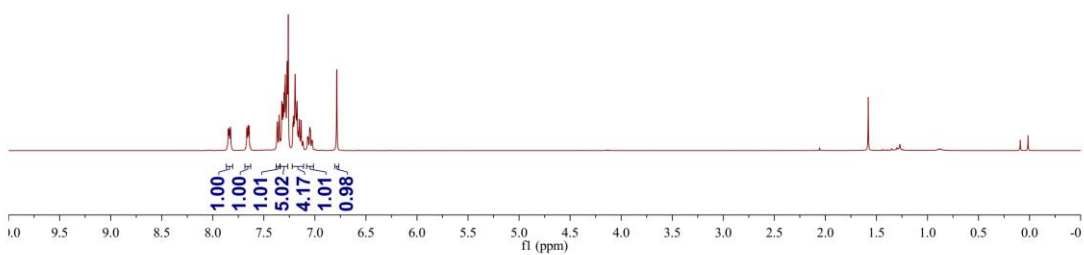

168.9  
163.4  
160.9  
141.0  
138.3  
137.4  
137.3  
133.0  
130.0  
129.4  
128.5  
128.4  
127.8  
126.0  
126.0  
124.7  
123.6  
120.9  
119.8  
119.6  
117.3  
117.0  
114.3  
110.0

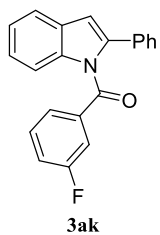

101 MHz in CDCl<sub>3</sub>

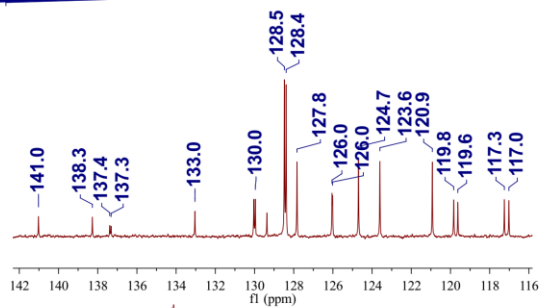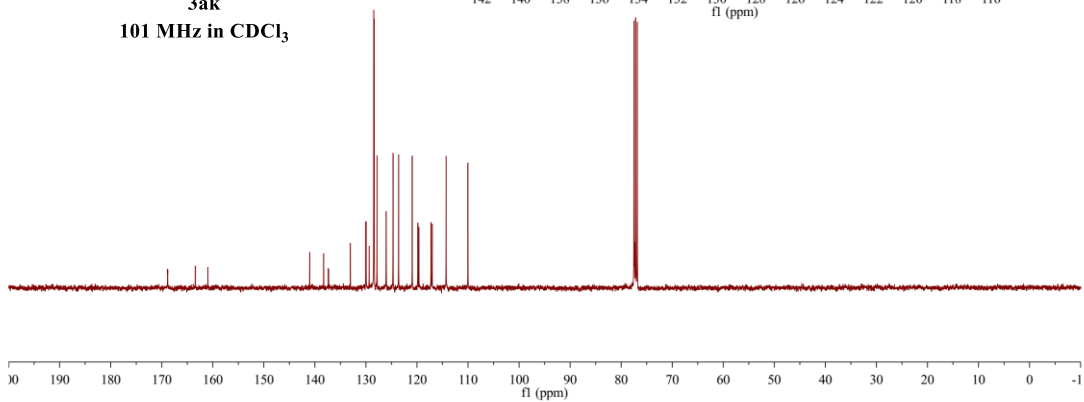

7.89  
7.87  
7.67  
7.65  
7.50  
7.48  
7.46  
7.33  
7.32  
7.31  
7.28  
7.28  
7.26  
7.21  
7.19  
7.17  
7.15  
7.13  
7.11  
6.78

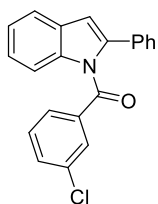

3al

400 MHz in CDCl<sub>3</sub>

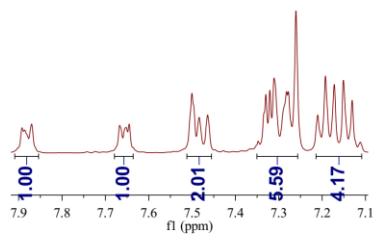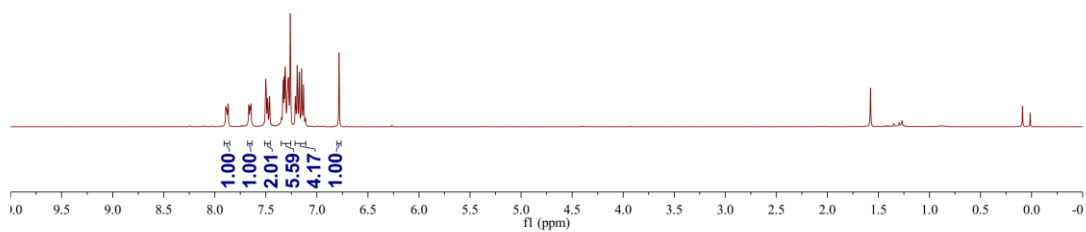

168.7  
141.0  
138.3  
136.9  
134.3  
133.0  
132.5  
130.3  
129.6  
129.4  
128.5  
128.4  
128.3  
127.9  
124.8  
123.7  
120.9  
114.4  
110.1

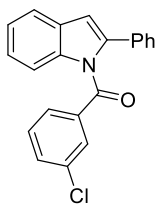

3al

101 MHz in CDCl<sub>3</sub>

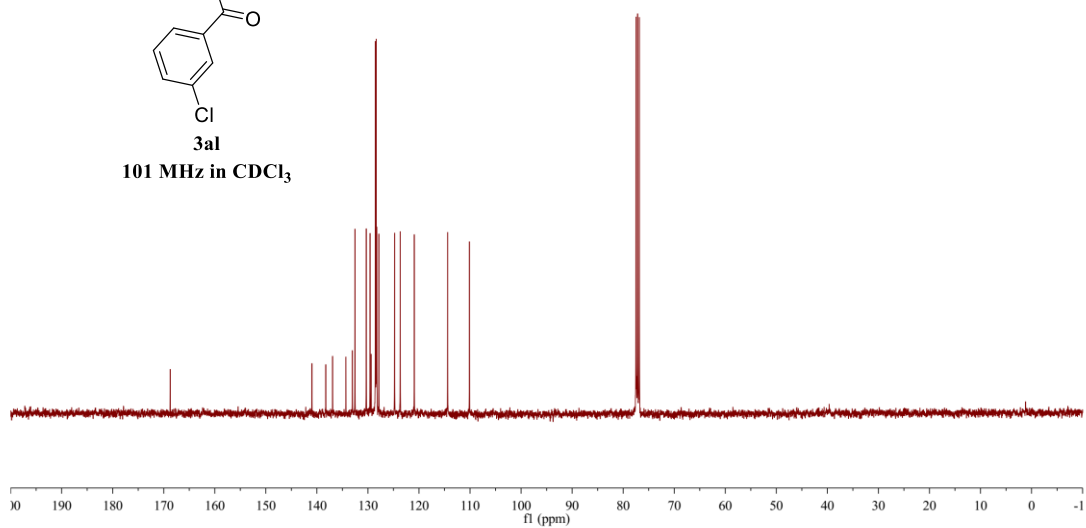

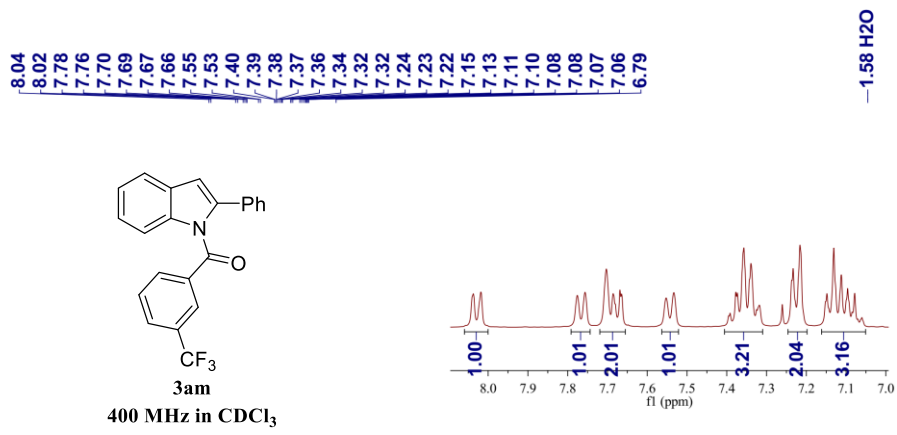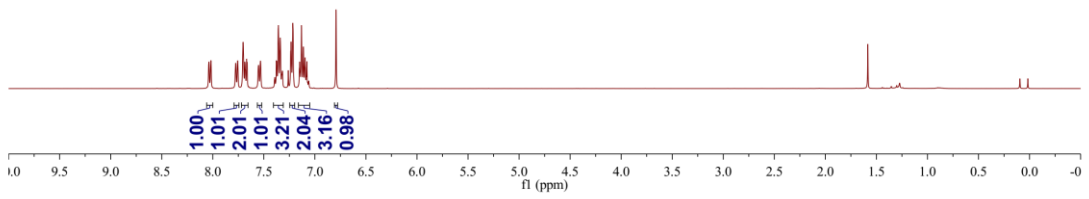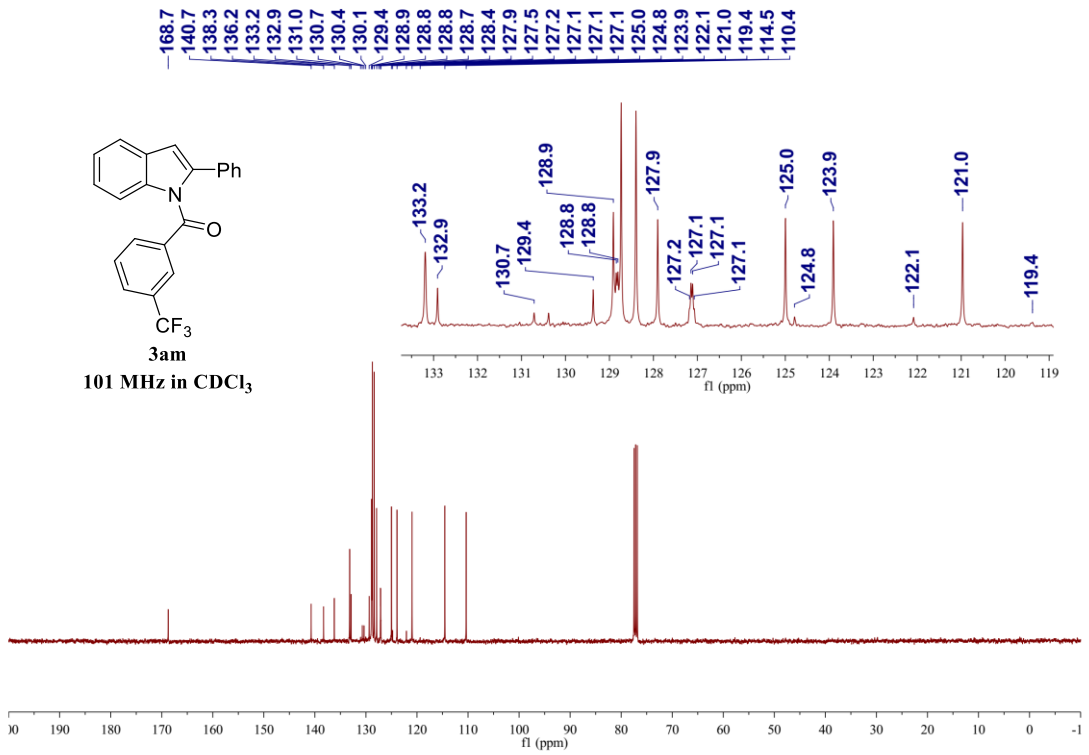

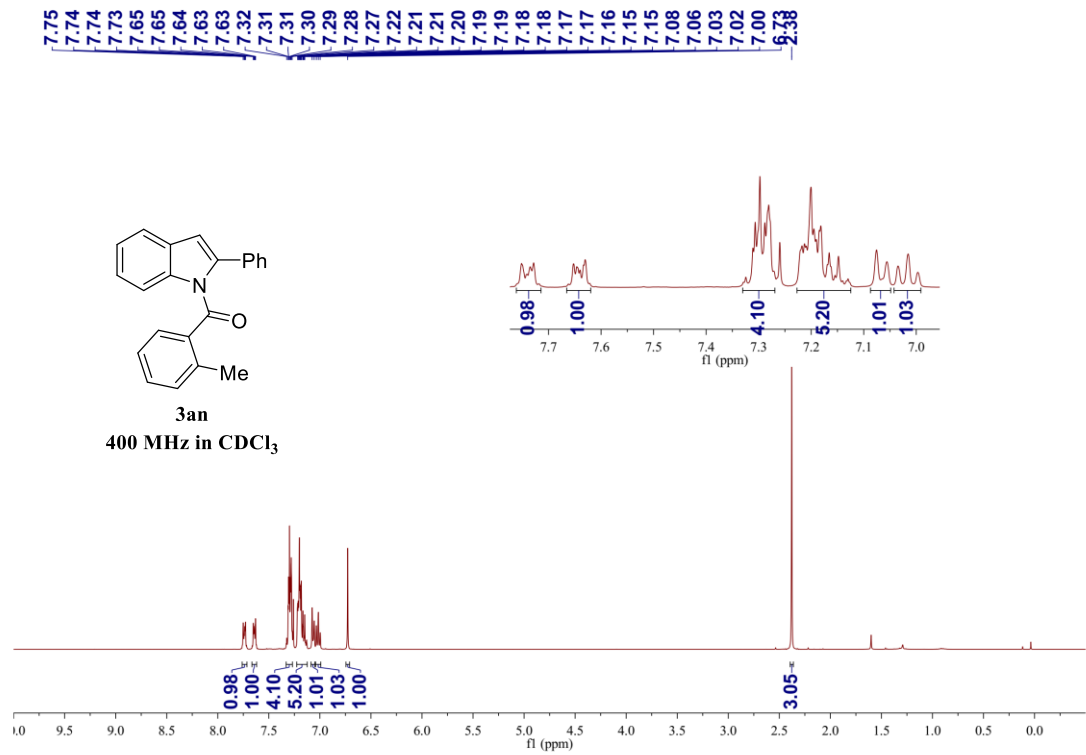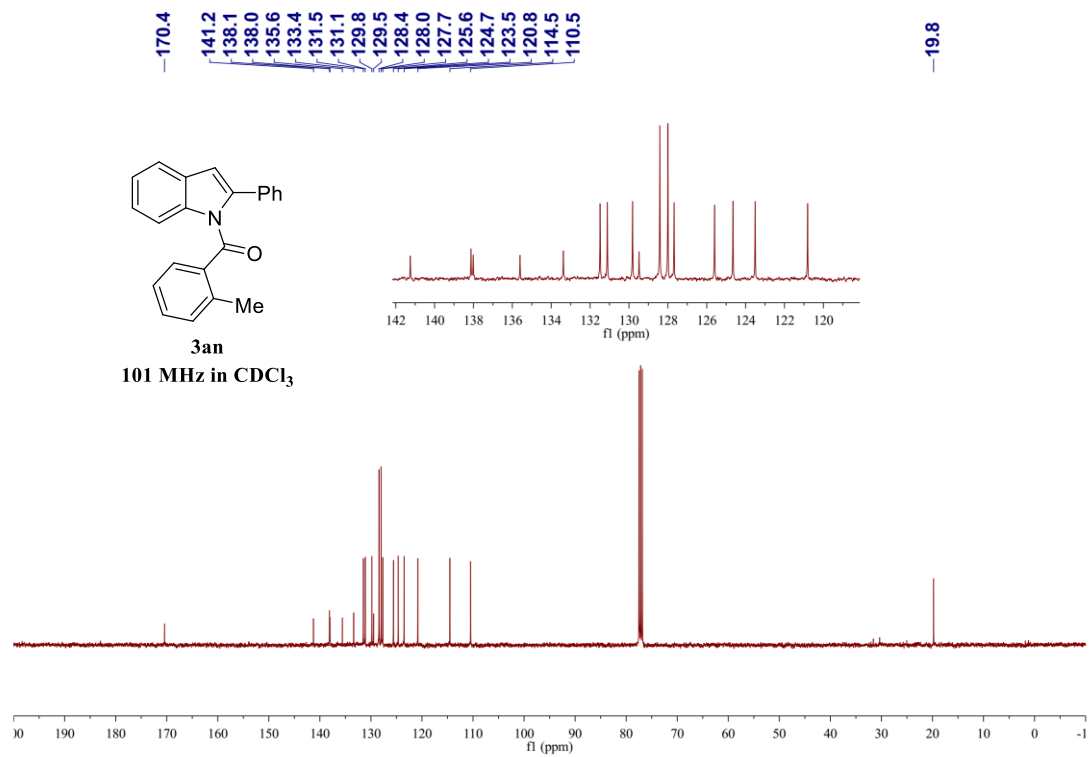



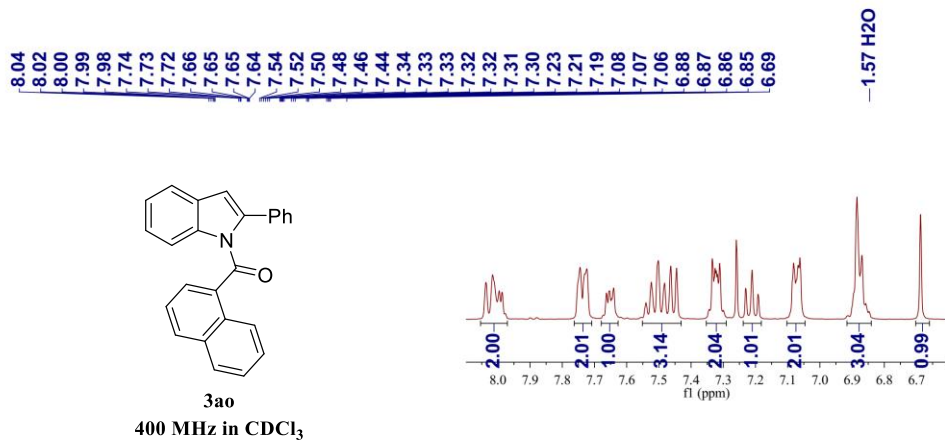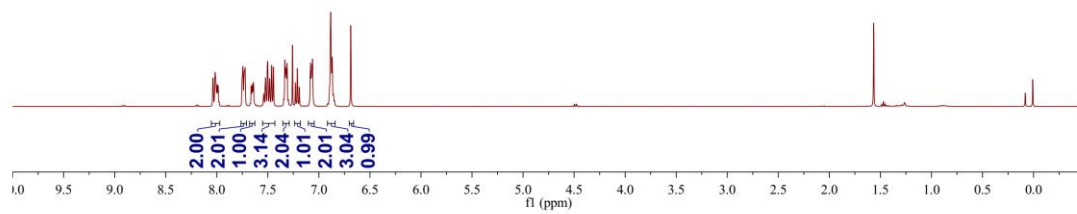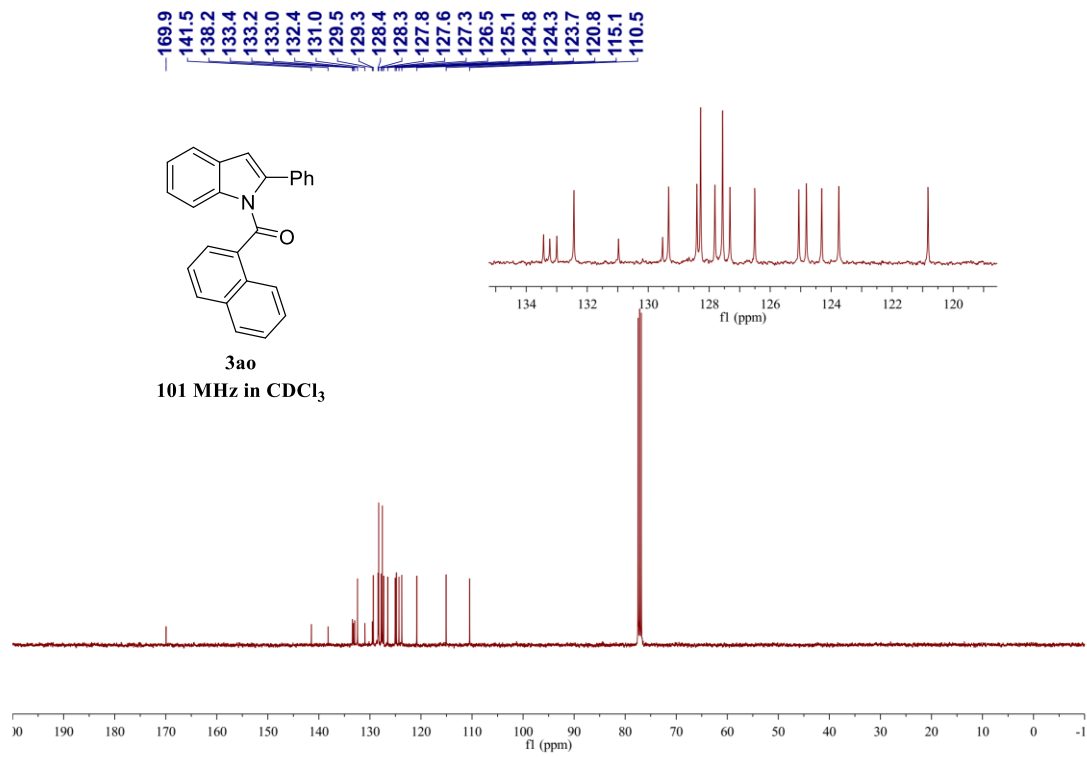

7.62  
7.61  
7.60  
7.60  
7.59  
7.58  
7.32  
7.30  
7.23  
7.23  
7.21  
7.19  
7.17  
7.16  
7.13  
6.75  
6.64  
6.62

1.55 H<sub>2</sub>O

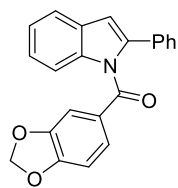

**3ap**

400 MHz in CDCl<sub>3</sub>

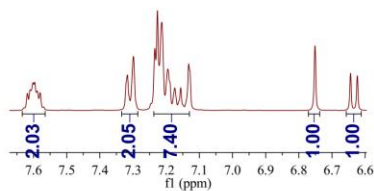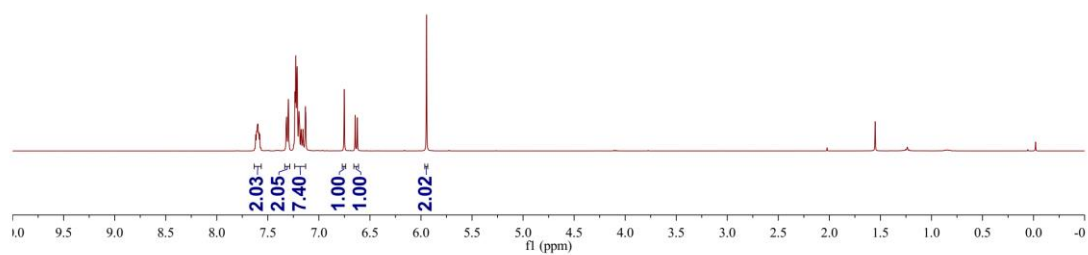

169.1  
151.9  
147.9  
141.4  
138.4  
133.1  
129.3  
129.0  
128.4  
128.2  
127.7  
127.0  
124.1  
123.0  
120.9  
113.9  
110.3  
109.0  
108.0  
102.0

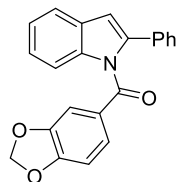

**3ap**

101 MHz in CDCl<sub>3</sub>

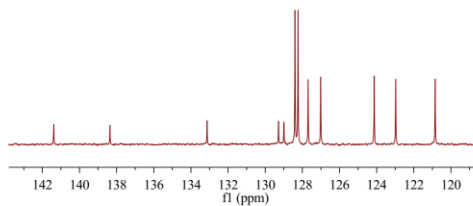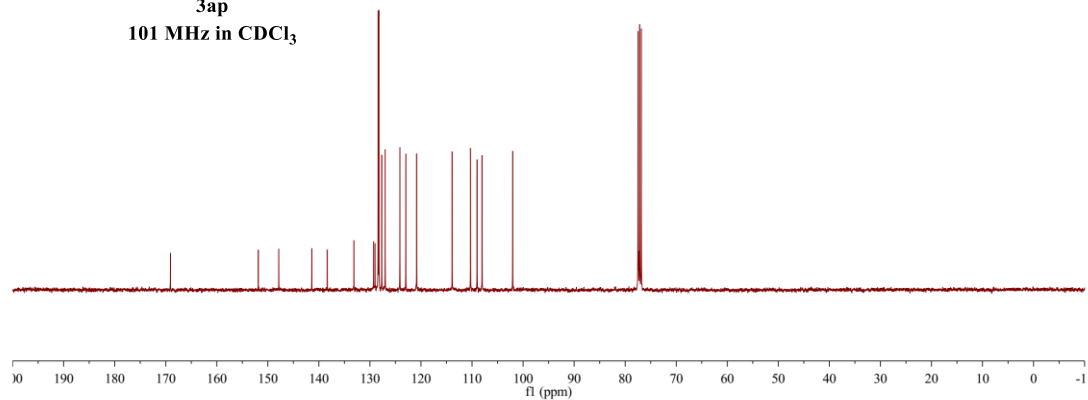

7.84  
7.83  
7.82  
7.82  
7.81  
7.81  
7.73  
7.72  
7.72  
7.66  
7.65  
7.65  
7.64  
7.64  
7.63  
7.35  
7.35  
7.34  
7.33  
7.33  
7.32  
7.31  
7.31  
7.30  
7.29  
7.29  
7.28  
7.25  
7.25  
7.25  
7.23  
7.23  
7.21  
7.19  
7.19  
7.19  
7.18  
7.17  
7.17  
7.16  
7.16  
7.15  
7.15  
7.13  
7.13  
7.12  
7.11  
7.11  
6.79  
1.58 H<sub>2</sub>O

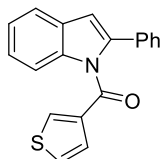

**3aq**  
400 MHz in CDCl<sub>3</sub>

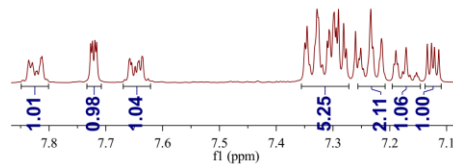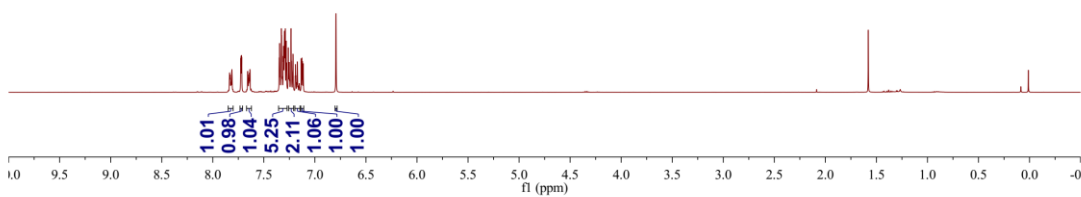

164.4  
140.9  
138.3  
137.8  
134.5  
133.2  
129.2  
128.5  
128.4  
128.2  
127.7  
126.2  
124.4  
123.2  
120.9  
114.0  
109.5

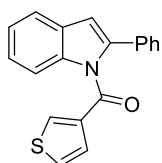

**3aq**  
101 MHz in CDCl<sub>3</sub>

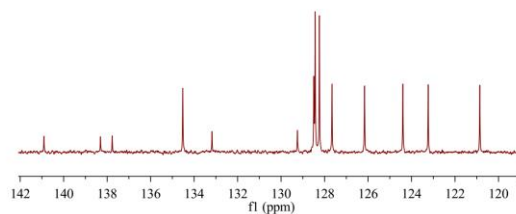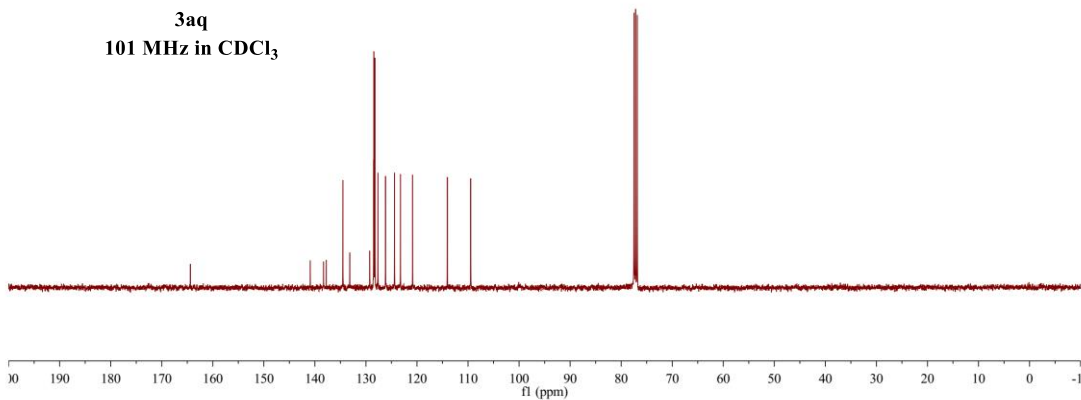

7.76  
7.74  
7.74  
7.72  
7.70  
7.55  
7.53  
7.51  
7.40  
7.38  
7.37  
7.36  
7.35  
7.35  
7.33  
7.33  
7.32  
7.30  
7.12  
7.10  
6.85

2.36

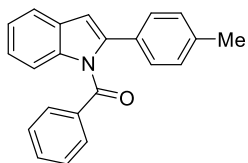

3ba

400 MHz in CDCl<sub>3</sub>

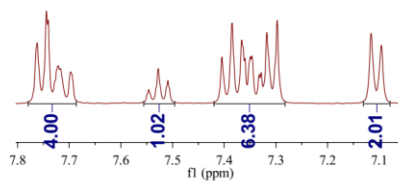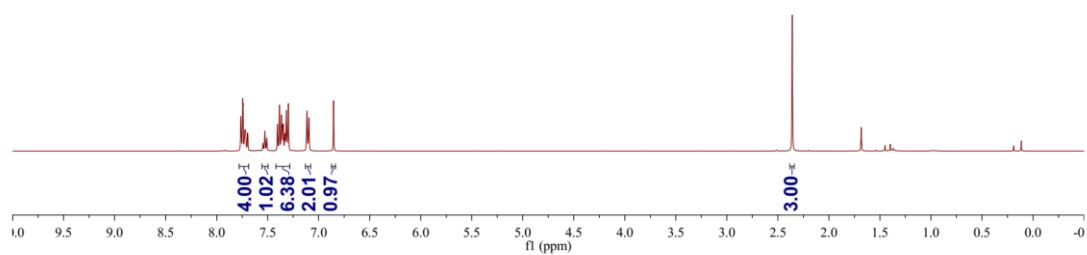

170.3

141.6  
138.2  
137.5  
135.2  
132.9  
130.4  
130.2  
129.5  
129.0  
128.4  
128.3  
124.1  
123.1  
120.7  
114.1  
109.1

21.3

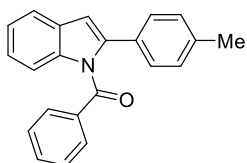

3ba

101 MHz in CDCl<sub>3</sub>

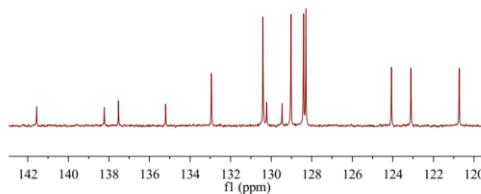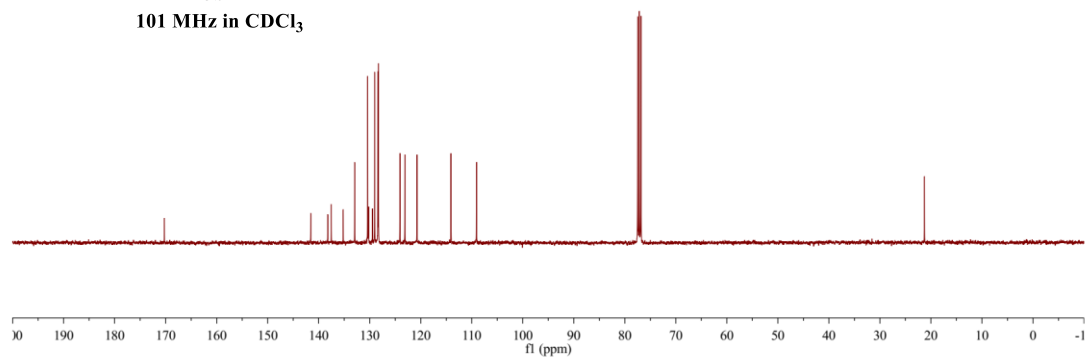

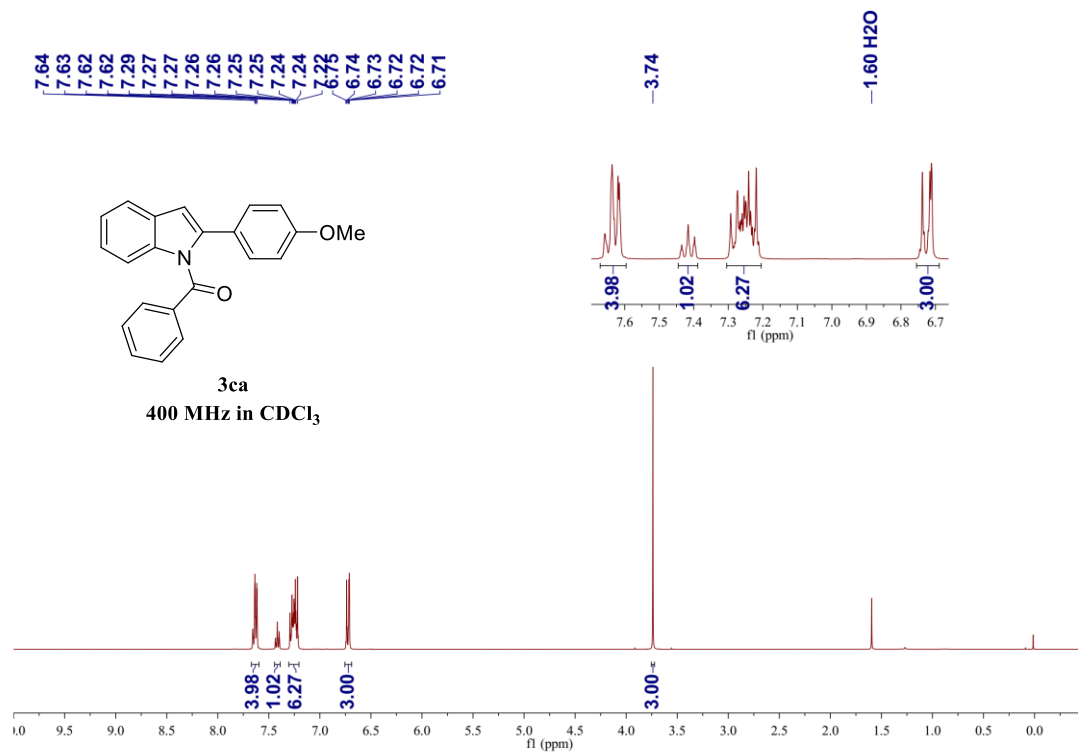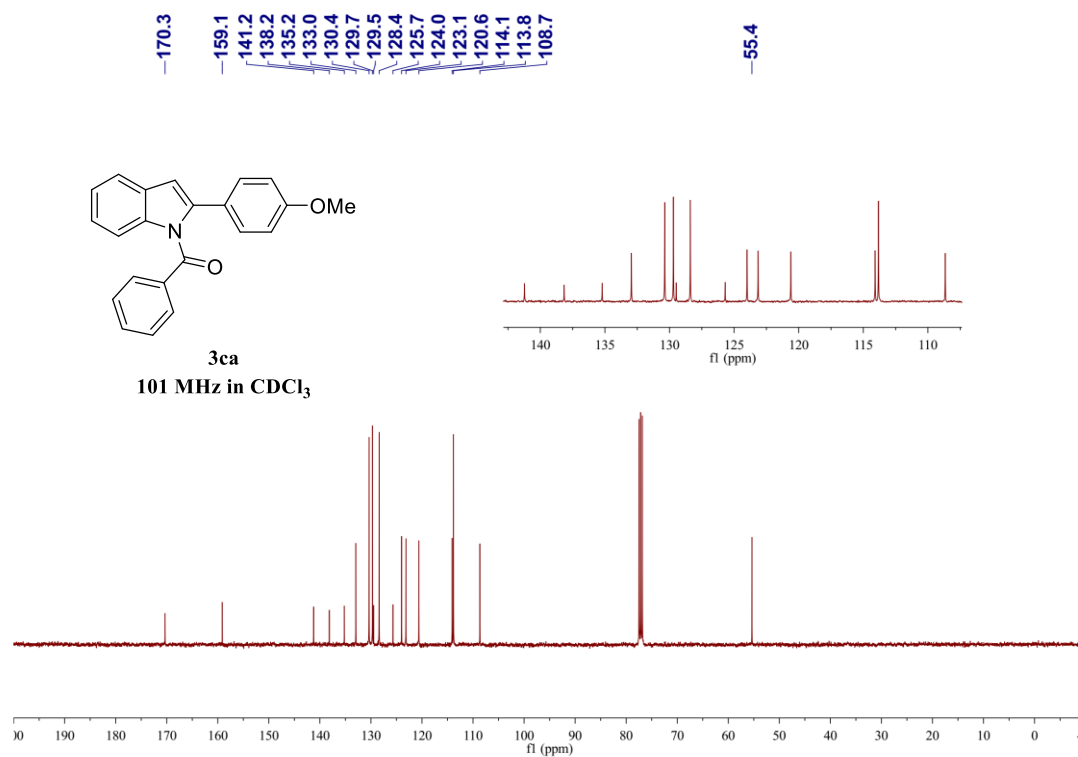

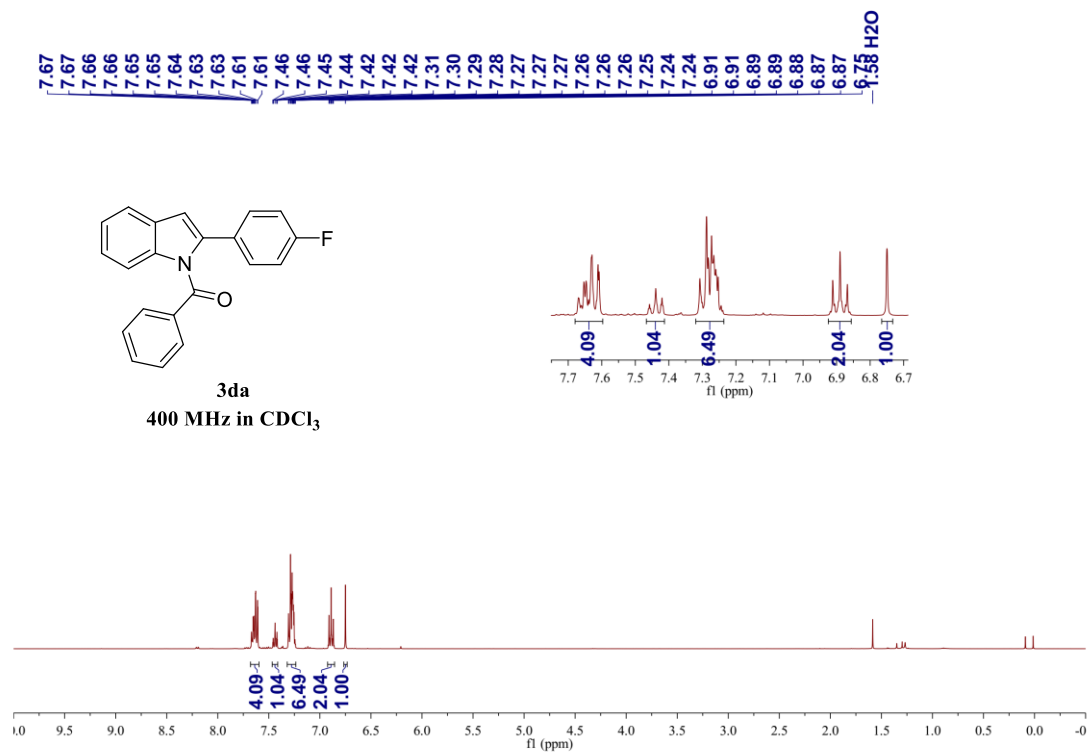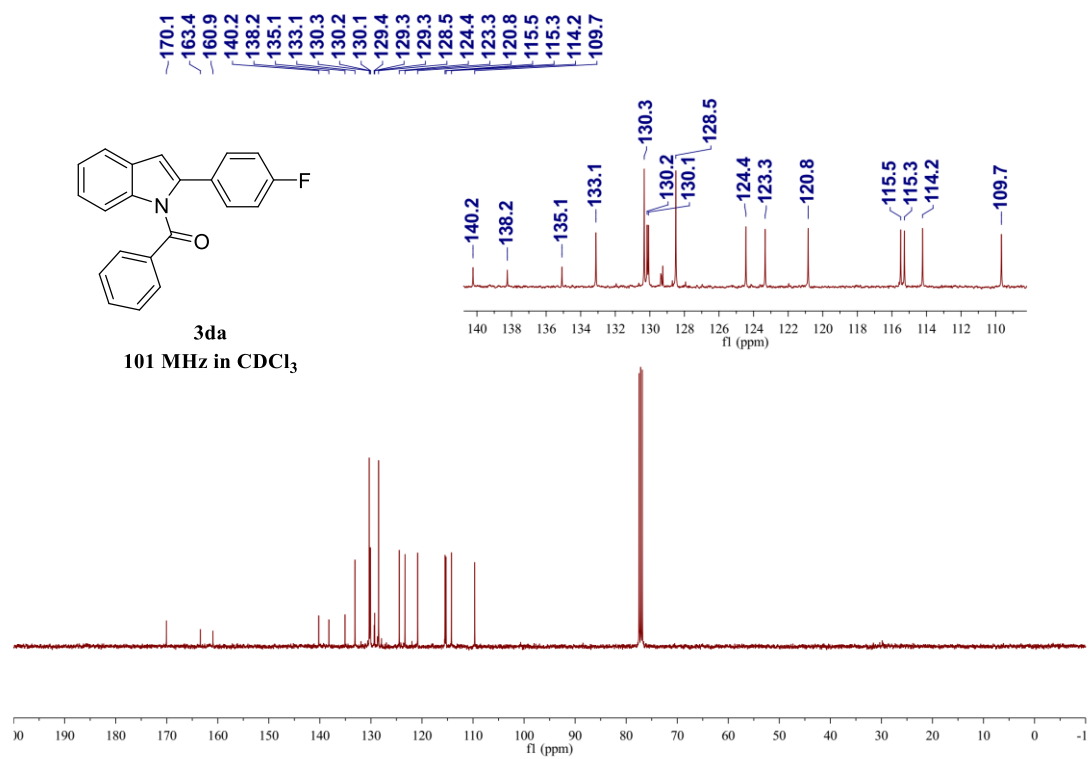

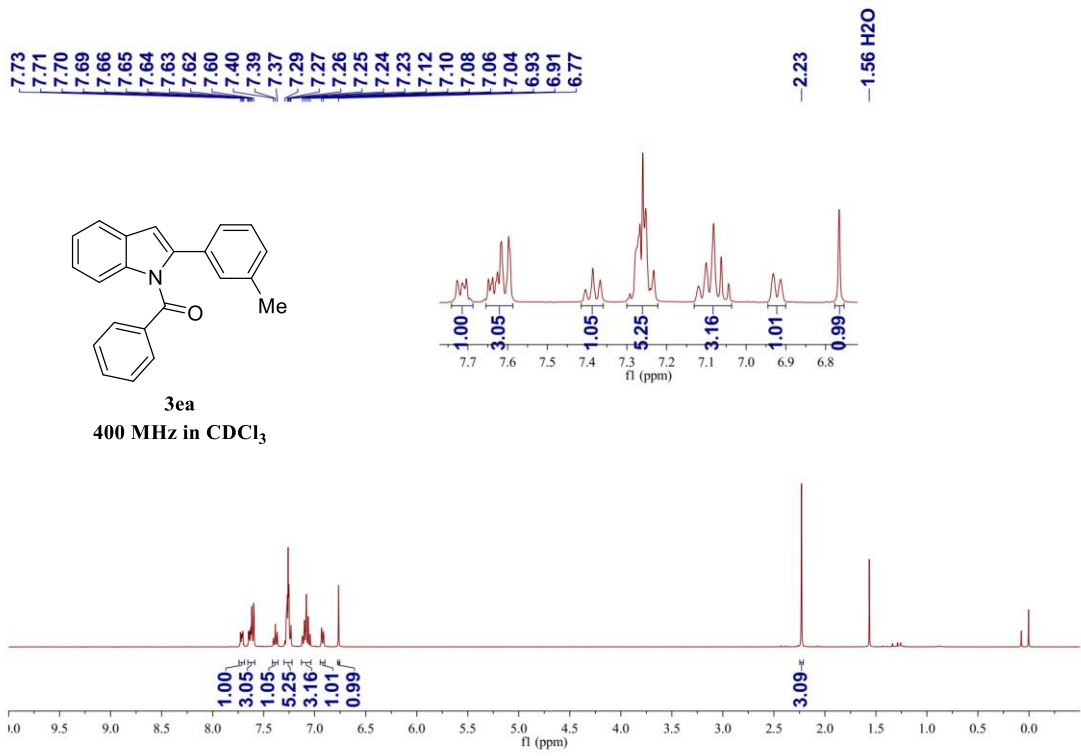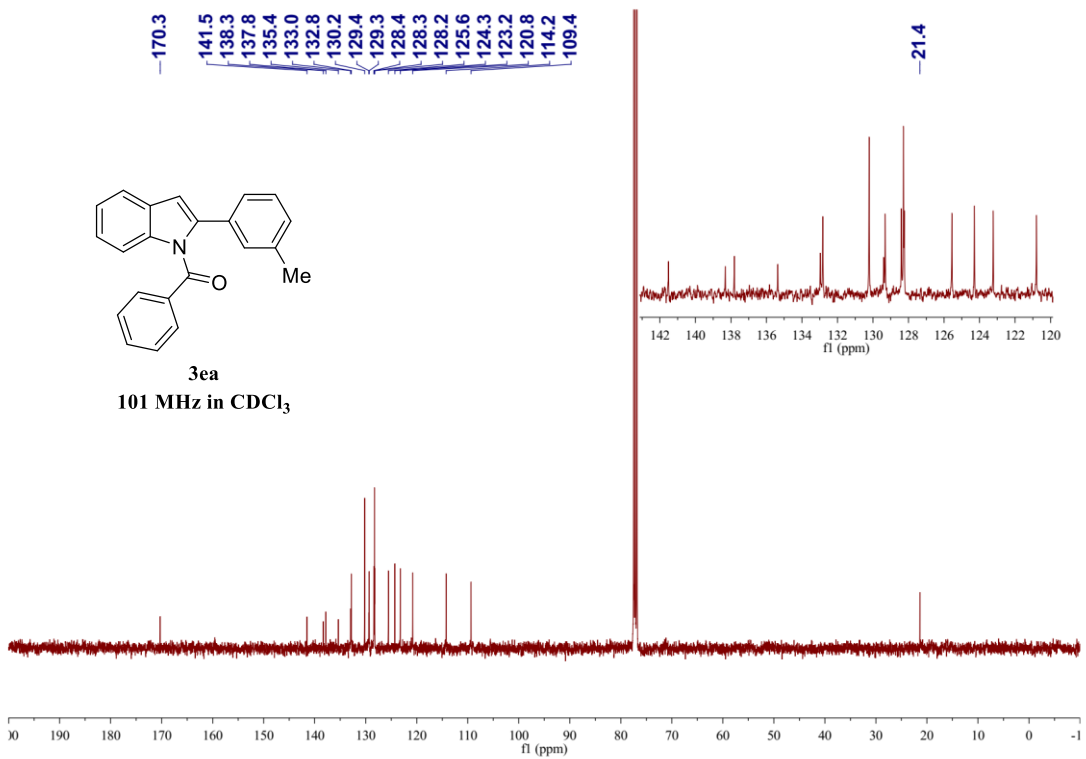

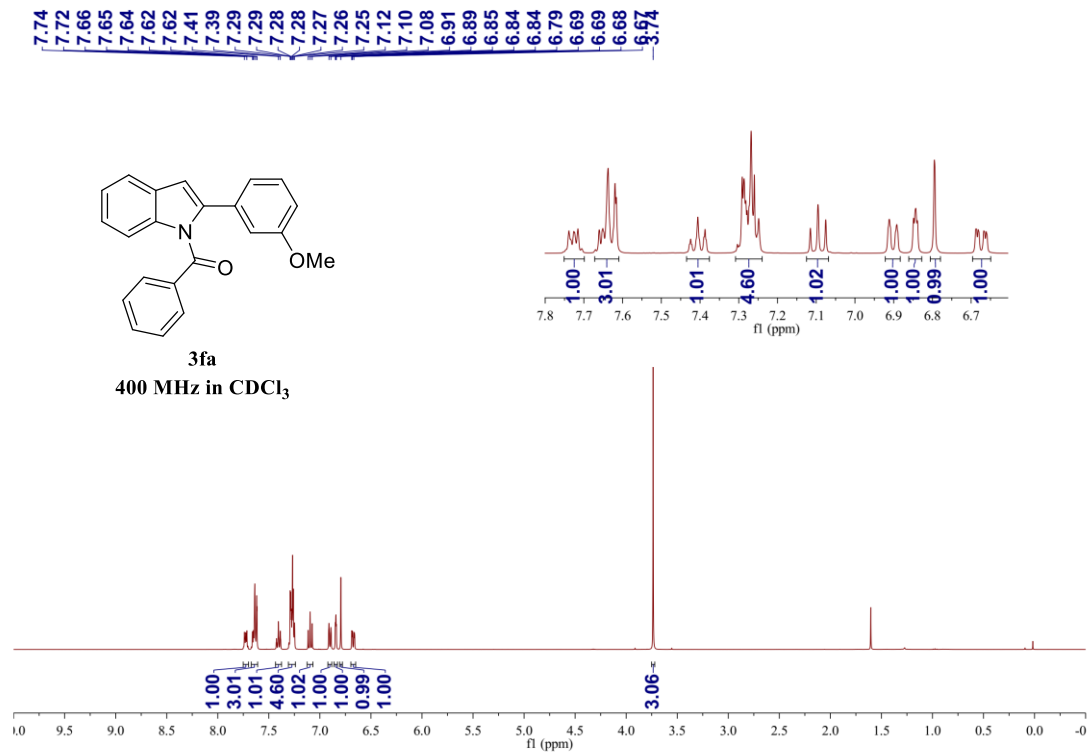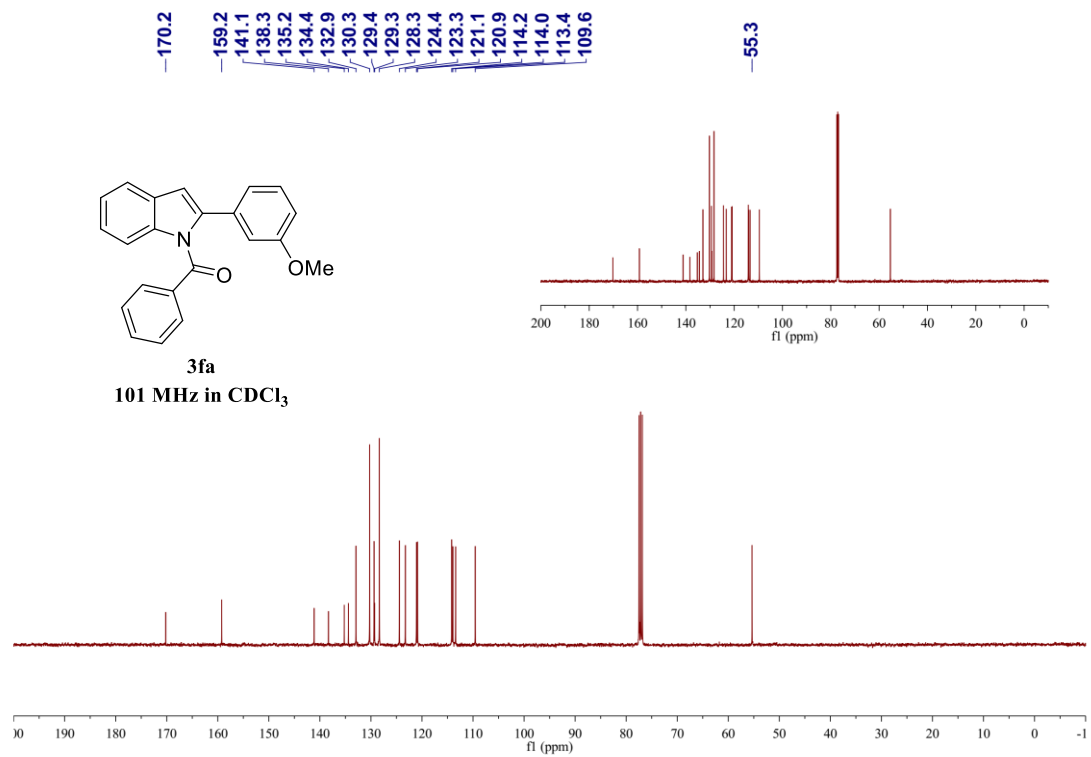



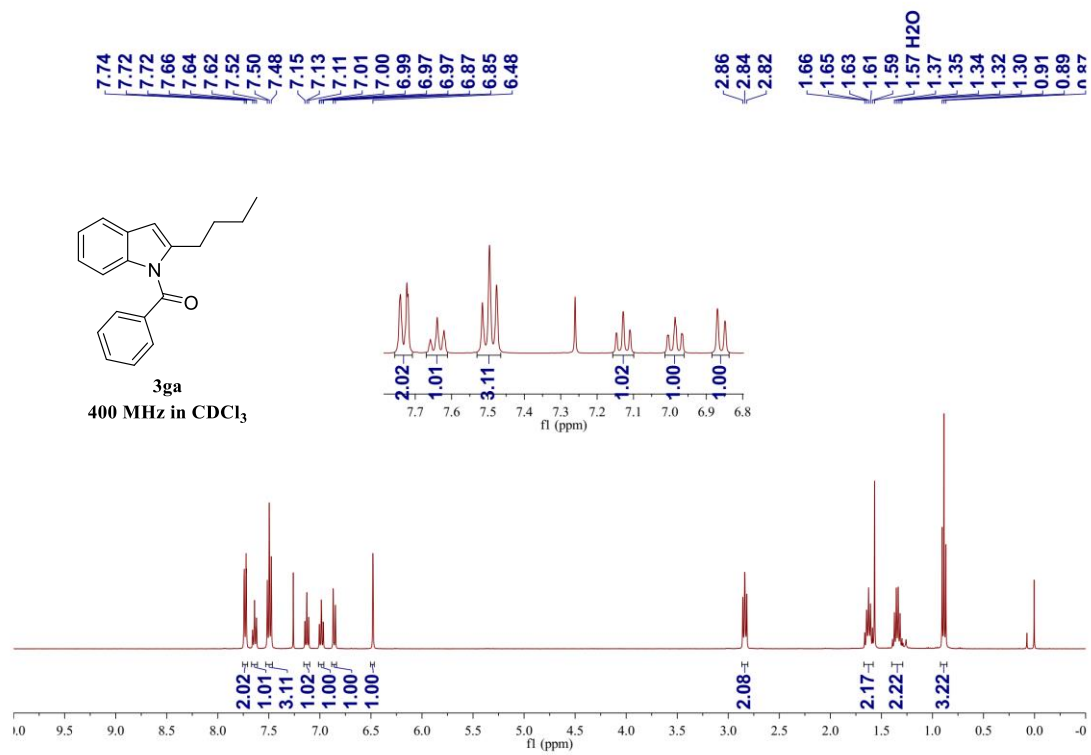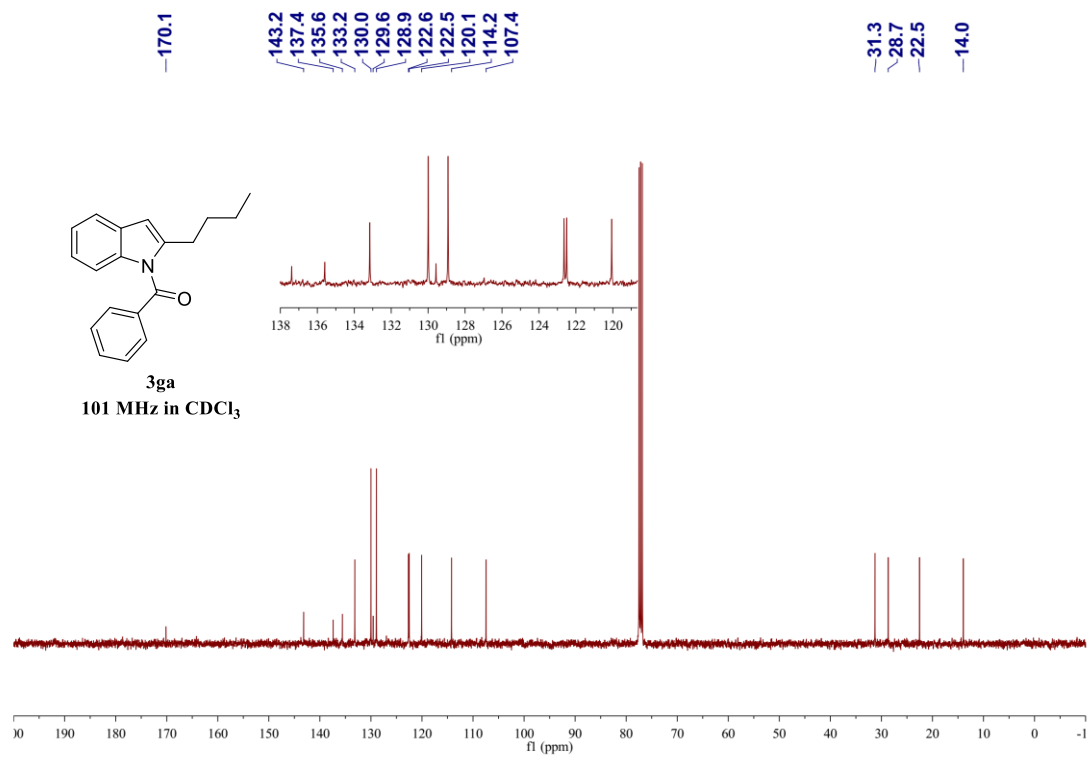

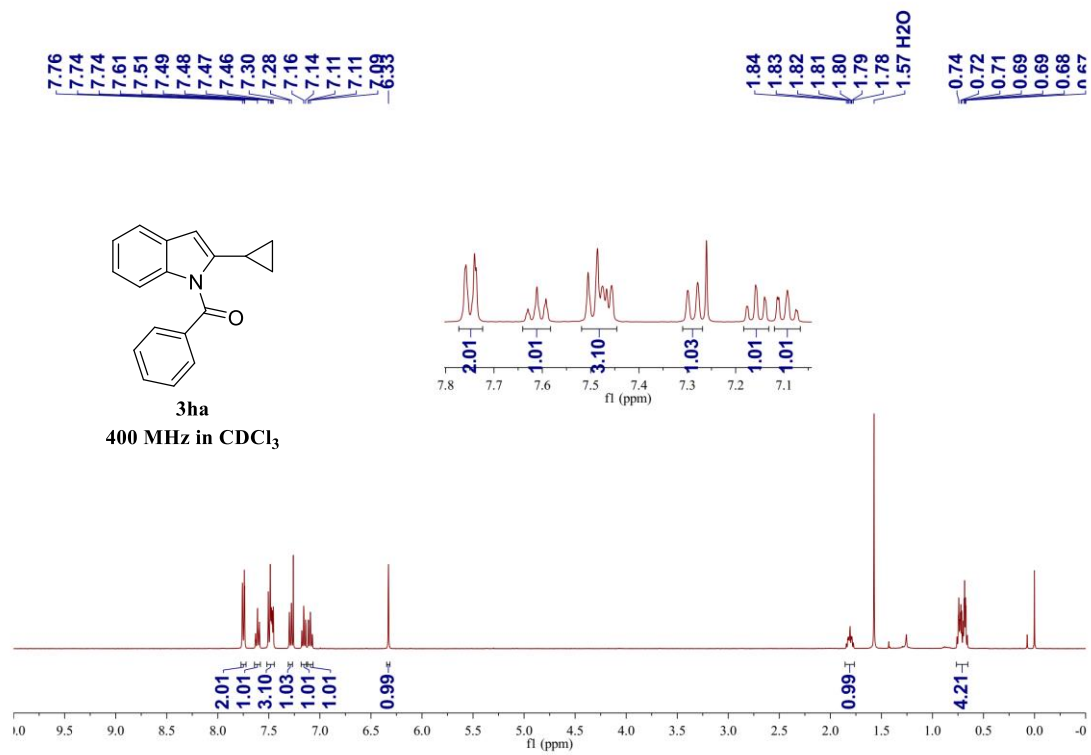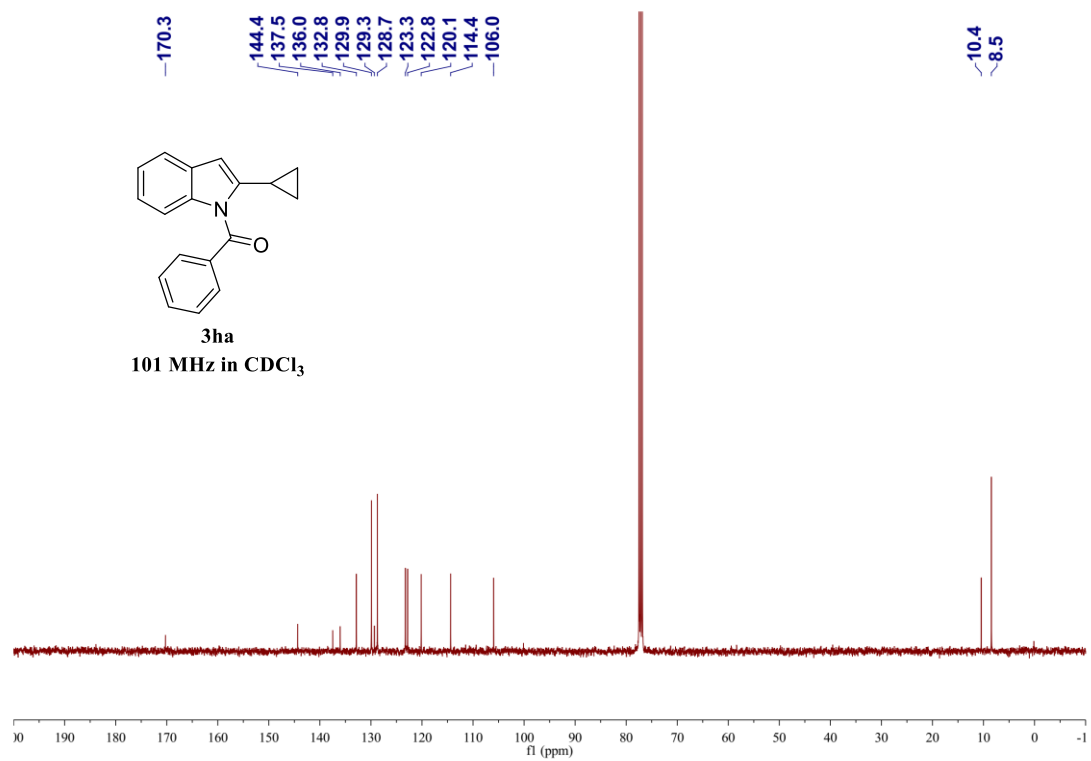

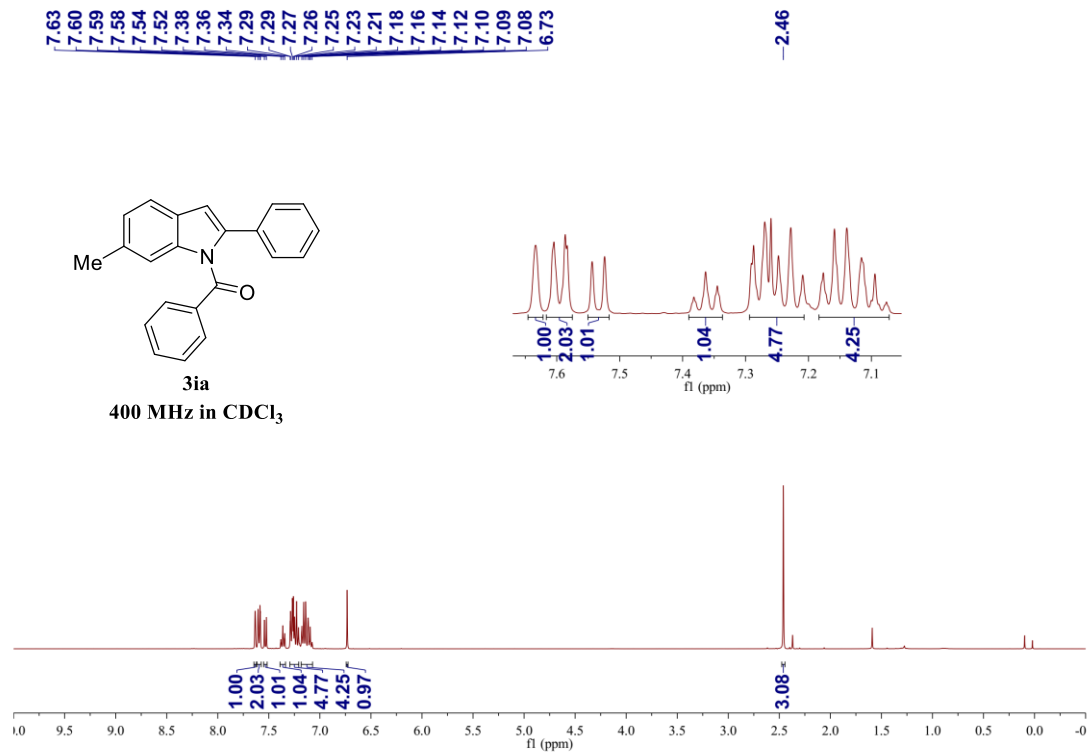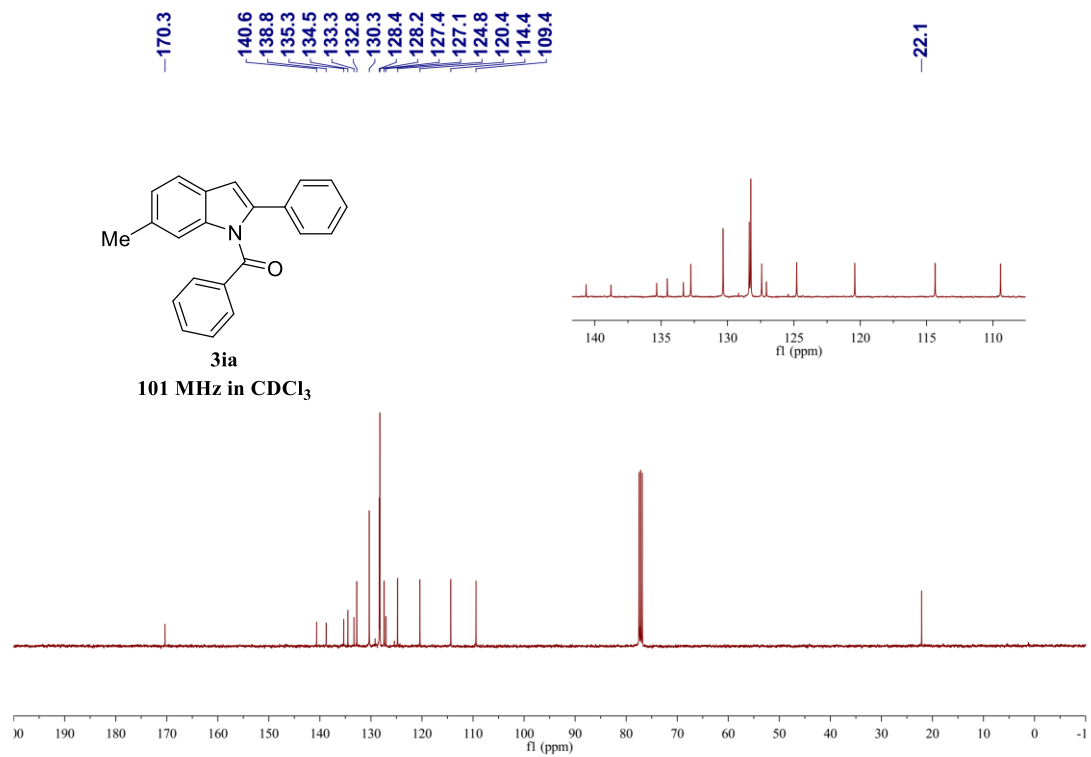

7.60  
7.58  
7.56  
7.55  
7.54  
7.49  
7.47  
7.40  
7.39  
7.37  
7.27  
7.26  
7.26  
7.24  
7.22  
7.18  
7.16  
7.15  
7.13  
7.12  
7.11  
7.09  
7.06  
7.04  
7.01  
6.73

1.56 H<sub>2</sub>O

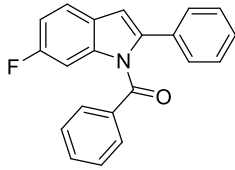

3ja

400 MHz in CDCl<sub>3</sub>

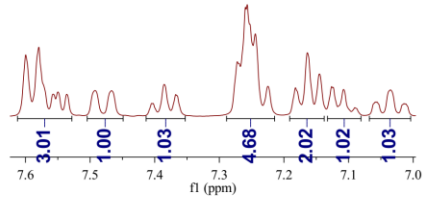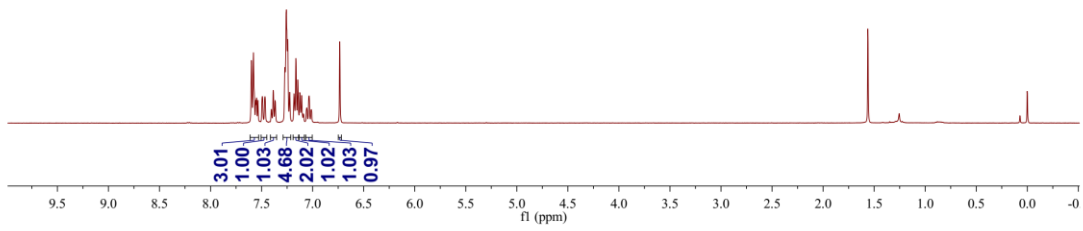

170.1  
162.1  
159.7  
134.8  
133.1  
132.9  
130.3  
128.4  
128.4  
128.3  
127.7  
121.5  
117.8  
111.5  
109.1  
101.7  
101.5

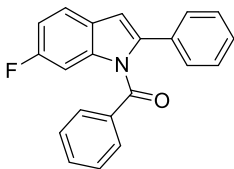

3ja

101 MHz in CDCl<sub>3</sub>

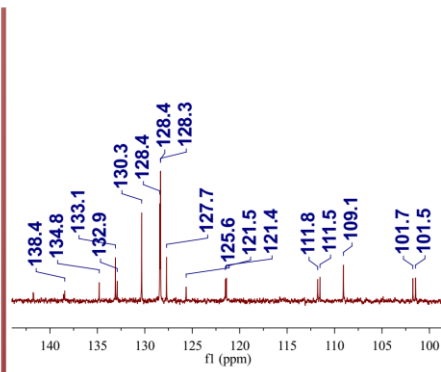

10 190 180 170 160 150 140 130 120 110 100 90 80 70 60 50 40 30 20 10 0 -1

7.65  
7.63  
7.61  
7.61  
7.60  
7.58  
7.41  
7.39  
7.38  
7.29  
7.29  
7.27  
7.26  
7.25  
7.23  
7.21  
7.21  
7.20  
7.18  
7.16  
7.15  
7.14  
7.13  
7.12  
7.11  
6.71

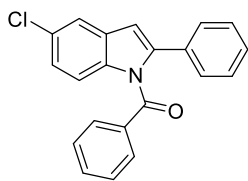

**3ka**  
400 MHz in CDCl<sub>3</sub>

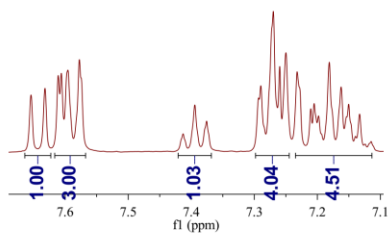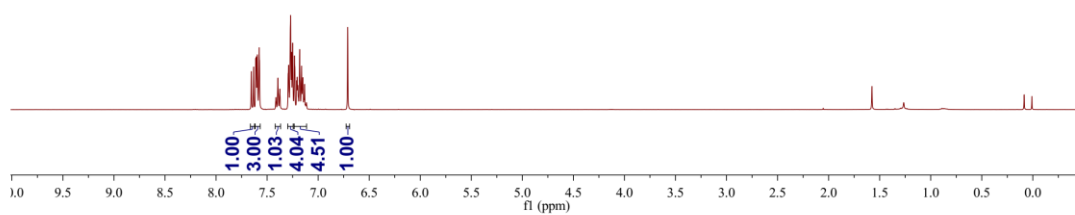

169.9  
142.6  
136.7  
134.8  
133.1  
132.6  
130.4  
130.3  
128.7  
128.5  
128.4  
128.4  
128.0  
124.5  
120.3  
115.2  
108.5

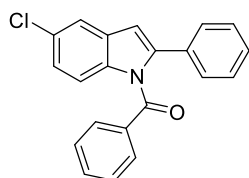

**3ka**  
101 MHz in CDCl<sub>3</sub>

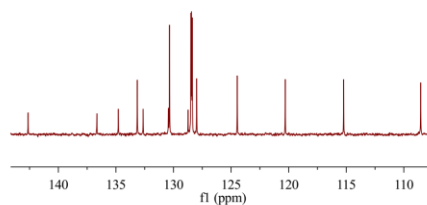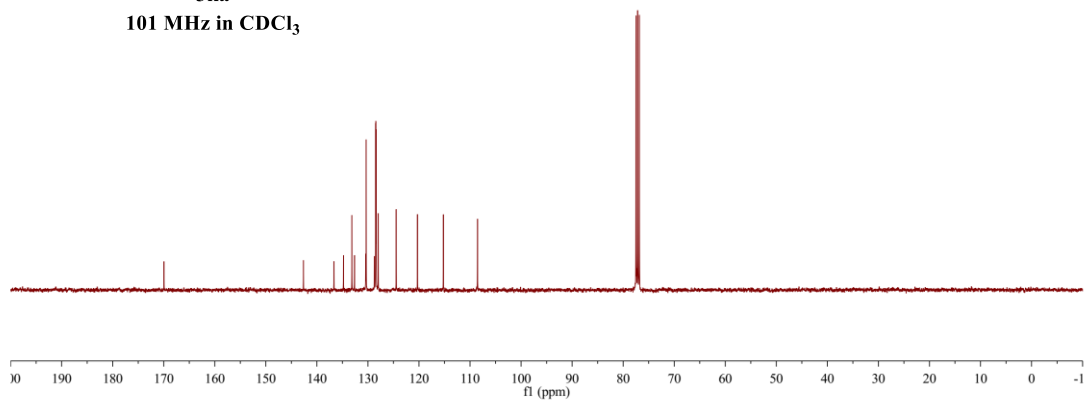

8.96  
8.65  
8.63  
7.98  
7.96  
7.59  
7.57  
7.56  
7.54  
7.51  
7.50  
7.48  
7.45  
7.43  
7.41  
7.40  
7.15  
7.13  
7.11

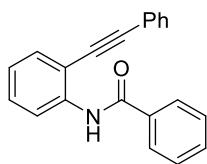

4

400 MHz in CDCl<sub>3</sub>

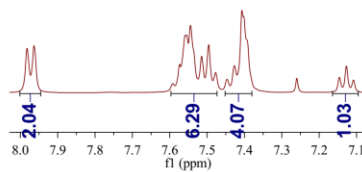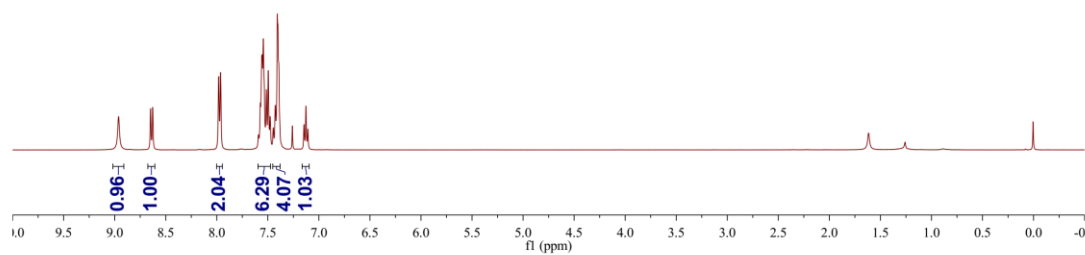

165.2  
139.2  
135.1  
132.2  
131.7  
131.5  
130.1  
129.1  
128.8  
127.1  
123.7  
122.4  
119.3  
112.4  
97.1  
84.6

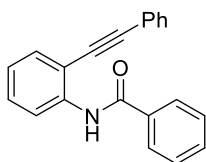

4

101 MHz in CDCl<sub>3</sub>

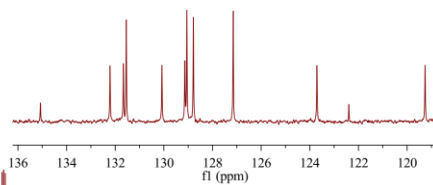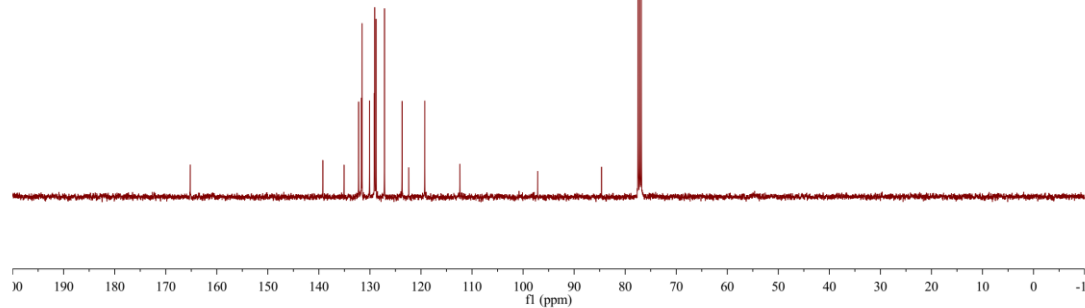

Supplement: d2qo00112h1.pdf [file d2qo00112h1.pdf]
